# Supplementary material
Source: publisher site journal article supplement (https://www.dovepress.com/article/337067)
Supplement: Supplementary file 1 [file get_supplementary_file.php]

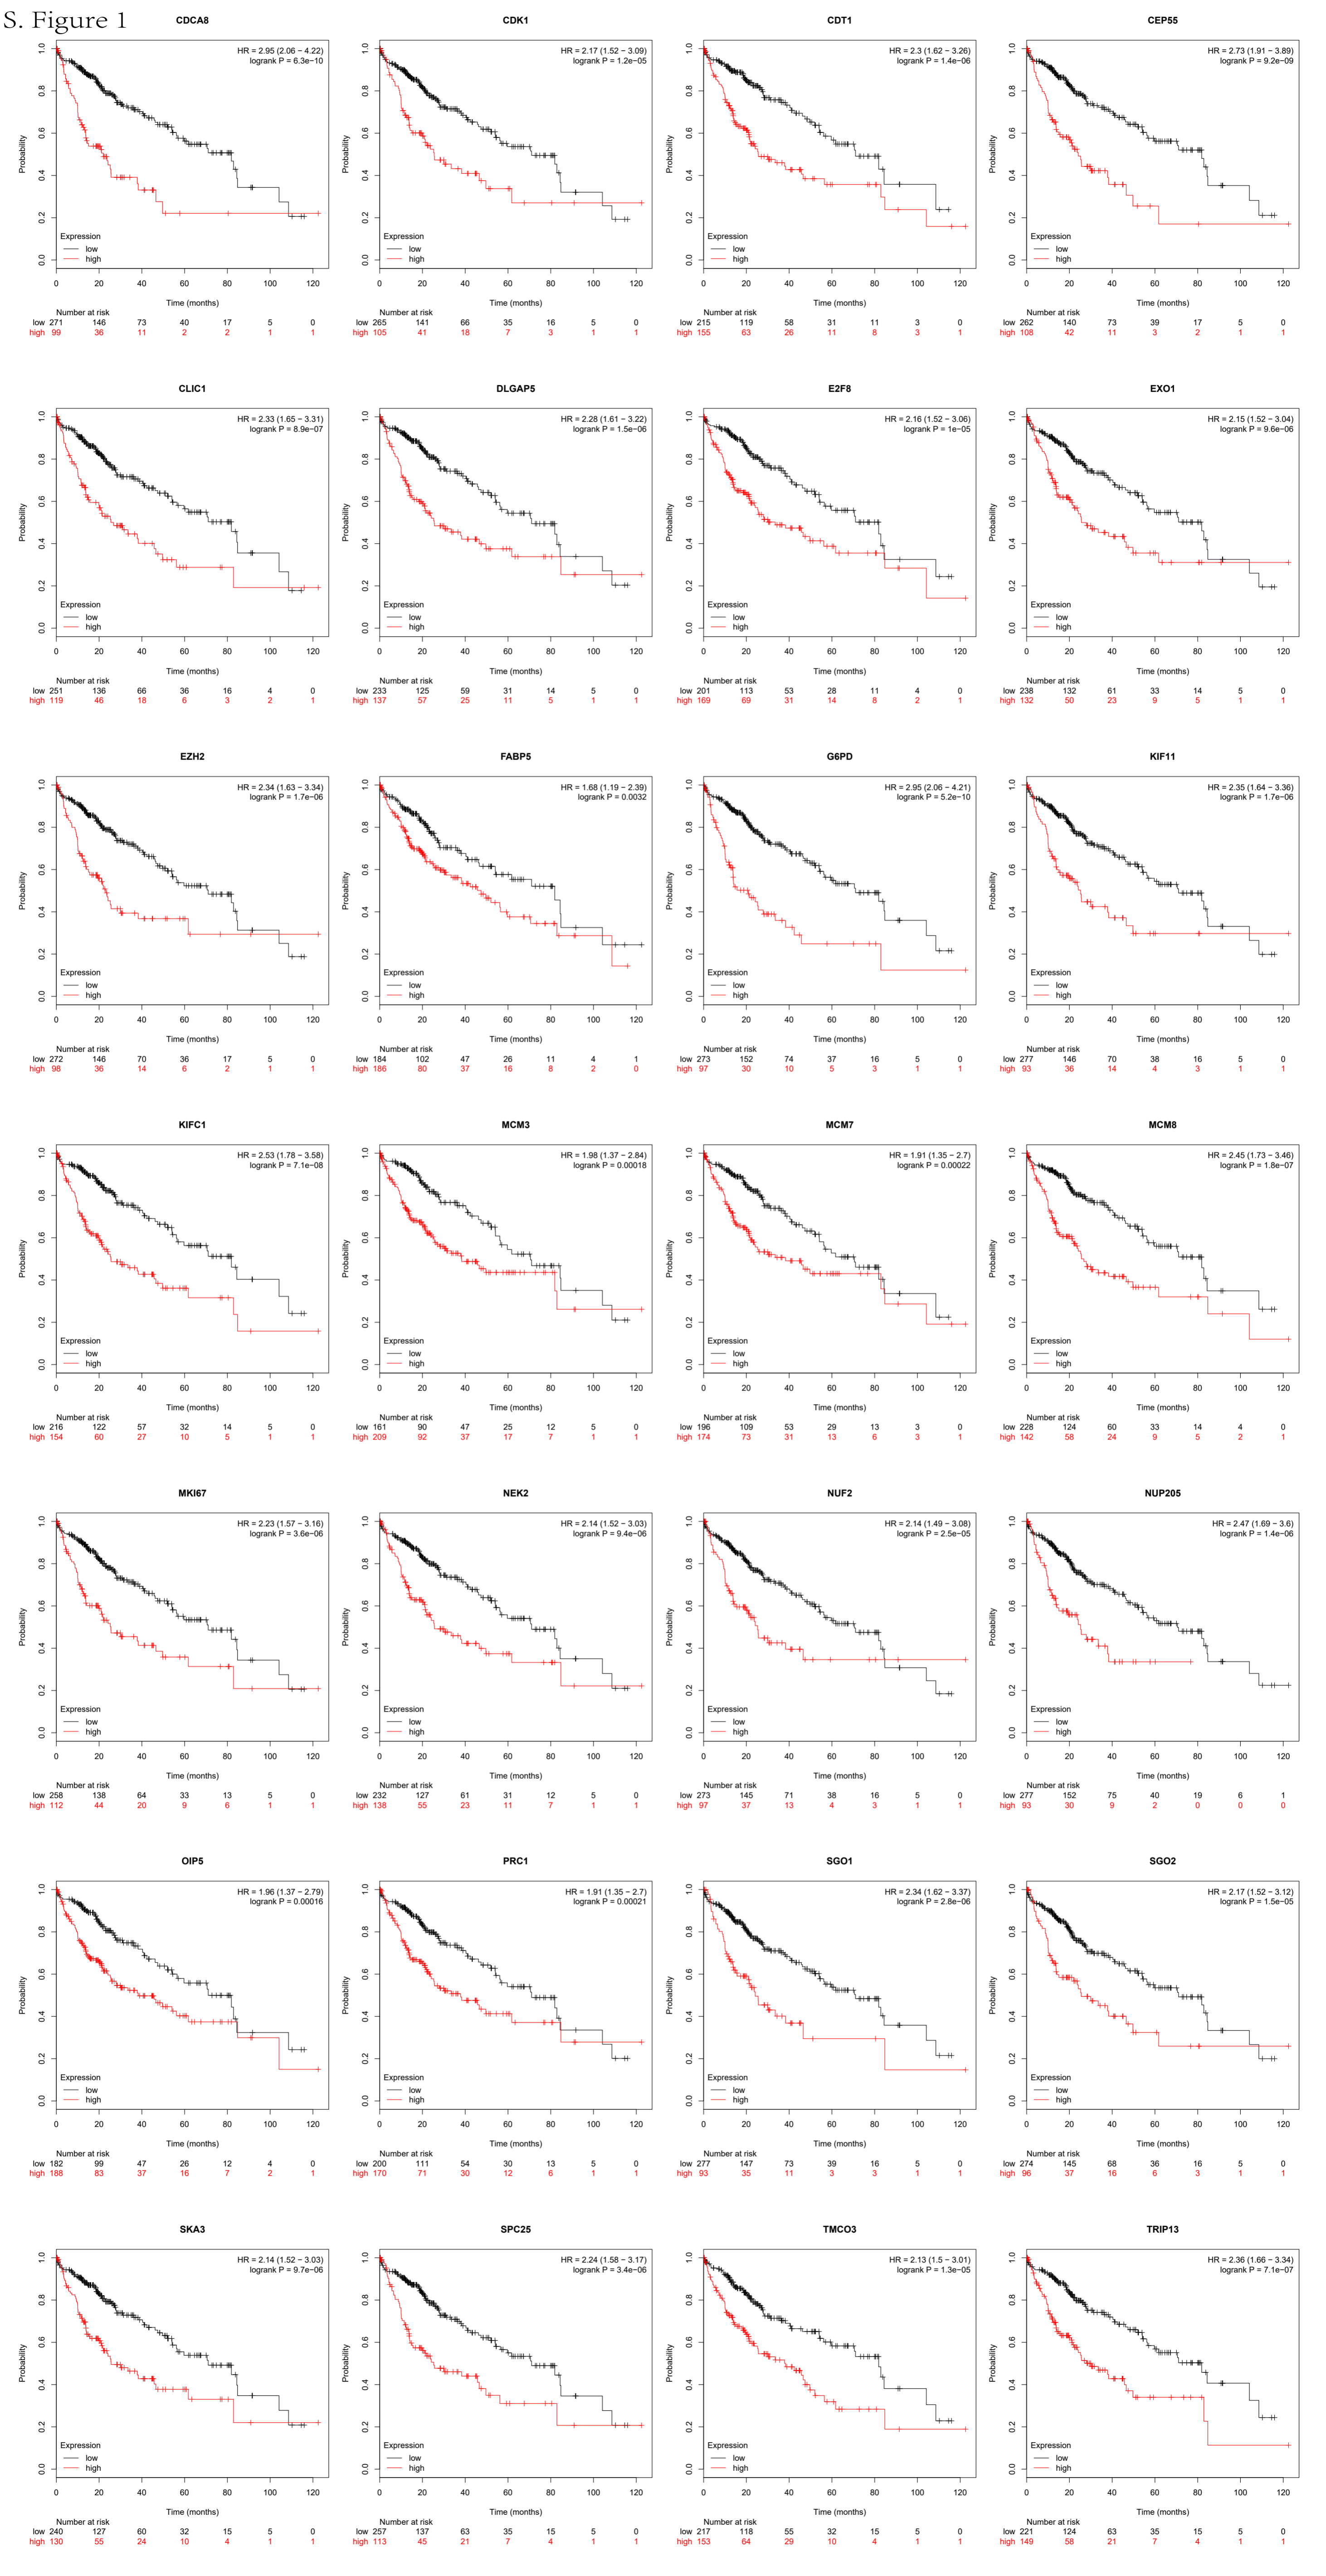

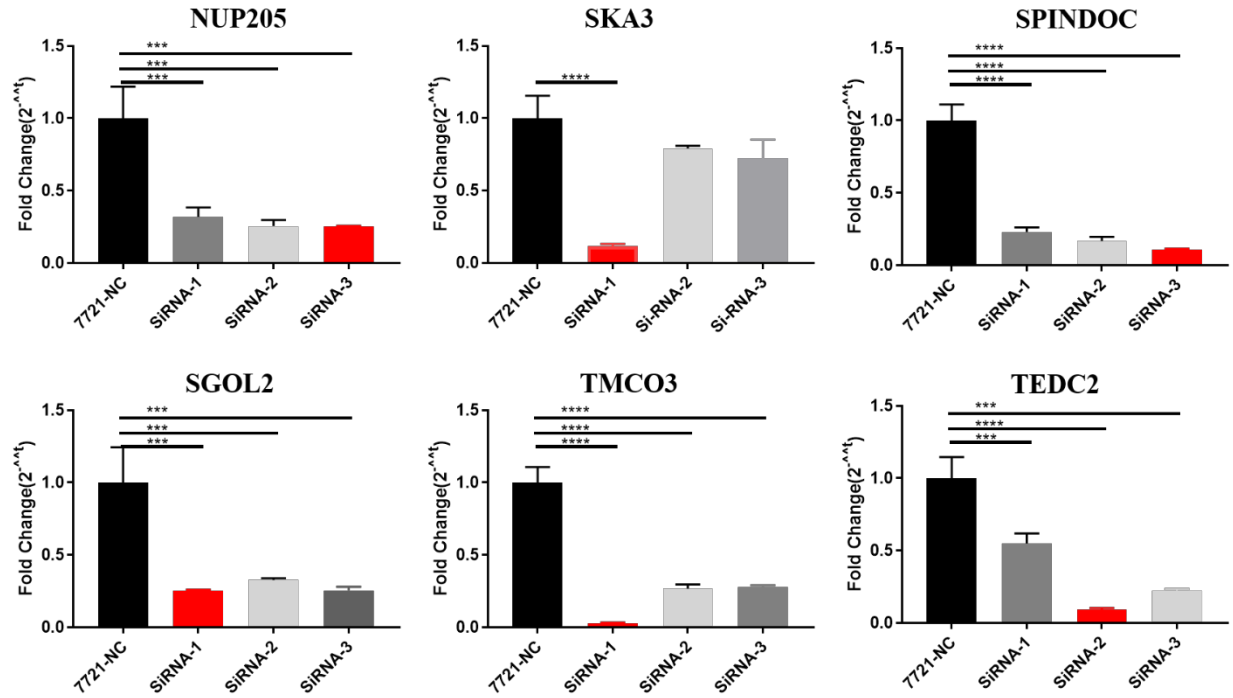

One-way ANOVA, \* $P < 0.05$ ; \*\* $P < 0.01$ ; \*\*\* $P < 0.001$ ; \*\*\*\* $P < 0.001$

**Supplementary Figure 2.** Three SiRNAs were designed to NUP205, SKA3, SPINDOC, SGOL2, TMCO3 and TEDC2 respectively, and qPCR was done to assay the effect of each SiRNA on each gene. The most effective SiRNA was elected to be used to further studies. The sequence of primers and SiRNAs were summarized in **Supplementary Table 6**.

**Supplementary Table 1.** The 500 differential survival genes in HCC through TCGA

| Gene Symbol   | Gene ID            | P-Value (Survival os) |
|---------------|--------------------|-----------------------|
| HILPDA        | ENSG00000135245.9  | 7.60E-09              |
| CCDC58        | ENSG00000160124.9  | 5.58E-08              |
| B3GAT3        | ENSG00000149541.9  | 2.30E-07              |
| CLEC3B        | ENSG00000163815.5  | 2.43E-07              |
| CTB-147N14.6  | ENSG00000275719.1  | 2.55E-07              |
| SOCS2         | ENSG00000120833.13 | 9.17E-07              |
| LPCAT1        | ENSG00000153395.9  | 1.25E-06              |
| PES1          | ENSG00000100029.17 | 1.79E-06              |
| DNASE1L3      | ENSG00000163687.13 | 1.87E-06              |
| AHSA1         | ENSG00000100591.7  | 1.92E-06              |
| RP11-286H15.1 | ENSG00000272789.1  | 2.25E-06              |
| SAC3D1        | ENSG00000168061.13 | 2.34E-06              |
| SEC61G        | ENSG00000132432.13 | 2.93E-06              |
| RP11-295D4.1  | ENSG00000262712.1  | 2.97E-06              |
| RHPN1-AS1     | ENSG00000254389.3  | 3.65E-06              |
| MTCH1         | ENSG00000137409.18 | 3.69E-06              |
| PTTG1         | ENSG00000164611.12 | 3.79E-06              |
| SAMD13        | ENSG00000203943.8  | 3.88E-06              |
| CDC20         | ENSG00000117399.13 | 4.00E-06              |
| RPUSD3        | ENSG00000156990.14 | 4.24E-06              |
| SLC41A3       | ENSG00000114544.15 | 4.36E-06              |
| STEAP1B       | ENSG00000105889.14 | 5.18E-06              |
| CCDC137       | ENSG00000185298.12 | 5.63E-06              |
| MED19         | ENSG00000156603.14 | 6.11E-06              |
| SNRPEP2       | ENSG00000256968.1  | 6.86E-06              |
| LINC01134     | ENSG00000236423.5  | 6.98E-06              |

|          |                    |          |
|----------|--------------------|----------|
| NRAV     | ENSG00000248008.2  | 7.04E-06 |
| TMEM185B | ENSG00000226479.3  | 7.08E-06 |
| HM13     | ENSG00000101294.16 | 7.14E-06 |
| NAP1L1P1 | ENSG00000254759.1  | 7.58E-06 |
| CELSR3   | ENSG00000008300.14 | 7.68E-06 |
| GNL2     | ENSG00000134697.12 | 8.47E-06 |
| EIF2S2   | ENSG00000125977.6  | 9.41E-06 |
| GPSM2    | ENSG00000121957.12 | 9.64E-06 |
| TIMM23   | ENSG00000265354.3  | 9.85E-06 |
| PPM1G    | ENSG00000115241.10 | 9.89E-06 |
| BTNL9    | ENSG00000165810.16 | 1.00E-05 |
| SLC29A3  | ENSG00000198246.7  | 1.01E-05 |
| KIF2C    | ENSG00000142945.12 | 1.08E-05 |
| MPV17    | ENSG00000115204.14 | 1.10E-05 |
| SCML2    | ENSG00000102098.17 | 1.22E-05 |
| TMEM251  | ENSG00000153485.5  | 1.22E-05 |
| MUTYH    | ENSG00000132781.17 | 1.30E-05 |
| EIF2B5   | ENSG00000145191.11 | 1.34E-05 |
| LRRC41   | ENSG00000132128.16 | 1.41E-05 |
| ATP1B3   | ENSG00000069849.10 | 1.42E-05 |
| UQCRH    | ENSG00000173660.11 | 1.43E-05 |
| RAB42    | ENSG00000188060.6  | 1.43E-05 |
| DTYMK    | ENSG00000168393.12 | 1.44E-05 |
| PIGU     | ENSG00000101464.10 | 1.44E-05 |
| FAM189B  | ENSG00000160767.20 | 1.45E-05 |
| ZNF576   | ENSG00000124444.15 | 1.51E-05 |
| RRP12    | ENSG00000052749.13 | 1.54E-05 |
| TAF3     | ENSG00000165632.7  | 1.63E-05 |

|              |                    |          |
|--------------|--------------------|----------|
| GARS         | ENSG00000106105.13 | 1.69E-05 |
| XPO5         | ENSG00000124571.17 | 1.69E-05 |
| ERGIC3       | ENSG00000125991.18 | 1.72E-05 |
| CLTA         | ENSG00000122705.16 | 1.77E-05 |
| SLC16A3      | ENSG00000141526.14 | 1.80E-05 |
| KIFC1        | ENSG00000237649.7  | 1.98E-05 |
| EIF5B        | ENSG00000158417.10 | 2.15E-05 |
| CMB9-22P13.1 | ENSG00000173727.11 | 2.21E-05 |
| TRPC4AP      | ENSG00000100991.11 | 2.24E-05 |
| GAPDH        | ENSG00000111640.14 | 2.27E-05 |
| CCT3         | ENSG00000163468.14 | 2.32E-05 |
| BRK1         | ENSG00000254999.3  | 2.32E-05 |
| CDC42EP2     | ENSG00000149798.4  | 2.34E-05 |
| TMEM106C     | ENSG00000134291.11 | 2.57E-05 |
| POLR2L       | ENSG00000177700.5  | 2.64E-05 |
| UBE2S        | ENSG00000108106.13 | 2.78E-05 |
| COMMD3       | ENSG00000148444.15 | 2.79E-05 |
| PPP1R14B     | ENSG00000173457.10 | 2.92E-05 |
| MRPL11       | ENSG00000174547.13 | 2.94E-05 |
| SLC11A1      | ENSG00000018280.16 | 3.00E-05 |
| CHEK1        | ENSG00000149554.12 | 3.03E-05 |
| SRD5A3       | ENSG00000128039.10 | 3.11E-05 |
| UCK2         | ENSG00000143179.12 | 3.17E-05 |
| MKLN1-AS     | ENSG00000236753.5  | 3.35E-05 |
| RP5-864K19.4 | ENSG00000228436.2  | 3.43E-05 |
| KRBA1        | ENSG00000133619.17 | 3.45E-05 |
| TMEM147      | ENSG00000105677.11 | 3.55E-05 |

|              |                    |          |
|--------------|--------------------|----------|
| CTC-297N7.9  | ENSG00000264016.2  | 3.57E-05 |
| HCFC1        | ENSG00000172534.13 | 3.63E-05 |
| ILKAP        | ENSG00000132323.8  | 3.64E-05 |
| AGTRAP       | ENSG00000177674.15 | 3.64E-05 |
| MAPKAPK5-AS1 | ENSG00000234608.7  | 3.70E-05 |
| NKX3-2       | ENSG00000109705.7  | 3.75E-05 |
| UPF3B        | ENSG00000125351.10 | 3.77E-05 |
| RRP8         | ENSG00000132275.10 | 4.16E-05 |
| ABCC5        | ENSG00000114770.16 | 4.22E-05 |
| C4orf47      | ENSG00000205129.8  | 4.23E-05 |
| CDKN2C       | ENSG00000123080.10 | 4.26E-05 |
| CCT4         | ENSG00000115484.14 | 4.37E-05 |
| NUP37        | ENSG00000075188.8  | 4.42E-05 |
| RAB24        | ENSG00000169228.13 | 4.45E-05 |
| MED10        | ENSG00000133398.3  | 4.56E-05 |
| MIR210HG     | ENSG00000247095.2  | 4.58E-05 |
| SLC1A5       | ENSG00000105281.12 | 4.67E-05 |
| SMS          | ENSG00000102172.15 | 4.70E-05 |
| AP001469.9   | ENSG00000239415.1  | 4.70E-05 |
| CCDC167      | ENSG00000198937.8  | 4.78E-05 |
| ACOT8        | ENSG00000101473.16 | 4.79E-05 |
| TM2D1        | ENSG00000162604.12 | 4.81E-05 |
| SNRPGP2      | ENSG00000264350.1  | 4.82E-05 |
| HEXB         | ENSG00000049860.13 | 4.83E-05 |
| ERI3         | ENSG00000117419.14 | 5.04E-05 |
| PPIL1        | ENSG00000137168.7  | 5.13E-05 |
| EZH2         | ENSG00000106462.10 | 5.25E-05 |

|               |                    |          |
|---------------|--------------------|----------|
| RP11-810P12.7 | ENSG00000279491.1  | 5.30E-05 |
| ABCF3         | ENSG00000161204.11 | 5.55E-05 |
| ACOT7         | ENSG00000097021.19 | 5.56E-05 |
| RNF8          | ENSG00000112130.16 | 5.58E-05 |
| ARHGEF39      | ENSG00000137135.17 | 5.61E-05 |
| NUP205        | ENSG00000155561.14 | 5.76E-05 |
| YBX1          | ENSG00000065978.17 | 5.78E-05 |
| NAP1L4        | ENSG00000205531.12 | 5.86E-05 |
| KPNA2         | ENSG00000182481.8  | 5.88E-05 |
| FABP5P7       | ENSG00000234964.4  | 5.88E-05 |
| 2-Mar         | ENSG00000117791.15 | 5.92E-05 |
| GTF3C2        | ENSG00000115207.13 | 5.97E-05 |
| YIF1B         | ENSG00000167645.16 | 6.16E-05 |
| MTMR2         | ENSG00000087053.18 | 6.23E-05 |
| PTDSS2        | ENSG00000174915.11 | 6.28E-05 |
| G6PD          | ENSG00000160211.15 | 6.64E-05 |
| FAM127B       | ENSG00000203950.6  | 6.75E-05 |
| BIRC5         | ENSG00000089685.14 | 6.93E-05 |
| SLC9A3R1      | ENSG00000109062.9  | 7.29E-05 |
| CDC25C        | ENSG00000158402.18 | 7.39E-05 |
| STK39         | ENSG00000198648.10 | 7.40E-05 |
| PRR13         | ENSG00000205352.10 | 7.42E-05 |
| ZNF691        | ENSG00000164011.17 | 7.49E-05 |
| MRTO4         | ENSG00000053372.4  | 7.49E-05 |
| VOPP1         | ENSG00000154978.12 | 7.64E-05 |
| CDCA2         | ENSG00000184661.13 | 7.69E-05 |
| E2F2          | ENSG00000007968.6  | 7.71E-05 |

|                  |                    |          |
|------------------|--------------------|----------|
| CMSS1            | ENSG00000184220.10 | 7.76E-05 |
| DYNC1LI1         | ENSG00000144635.8  | 7.94E-05 |
| SPC25            | ENSG00000152253.8  | 7.99E-05 |
| FKBP4            | ENSG00000004478.7  | 8.02E-05 |
| RANBP1           | ENSG00000099901.16 | 8.06E-05 |
| LCAT             | ENSG00000213398.7  | 8.15E-05 |
| DYNLL1           | ENSG00000088986.10 | 8.16E-05 |
| CEBPZOS          | ENSG00000218739.9  | 8.33E-05 |
| UBE2E1           | ENSG00000170142.11 | 8.42E-05 |
| RP11-421M1.8     | ENSG00000272097.1  | 8.45E-05 |
| RP11-669E14.4    | ENSG00000262881.1  | 8.48E-05 |
| SF3B4            | ENSG00000143368.9  | 8.48E-05 |
| THAP2            | ENSG00000173451.6  | 8.54E-05 |
| FTH1P11          | ENSG00000237264.4  | 8.59E-05 |
| ADAMTS5          | ENSG00000154736.5  | 8.63E-05 |
| ATP5G1P4         | ENSG00000227440.1  | 8.64E-05 |
| TUBA1C           | ENSG00000167553.14 | 8.81E-05 |
| C3orf35          | ENSG00000198590.11 | 8.86E-05 |
| BCL10            | ENSG00000142867.12 | 8.93E-05 |
| PRAF2            | ENSG00000243279.3  | 8.94E-05 |
| ZNF37BP          | ENSG00000234420.7  | 9.11E-05 |
| TMCO3            | ENSG00000150403.17 | 9.15E-05 |
| RP11-620J15.3    | ENSG00000257698.1  | 9.67E-05 |
| LL22NC03-80A10.6 | ENSG00000272779.1  | 9.74E-05 |
| TP53RK           | ENSG00000172315.5  | 9.75E-05 |
| RP9P             | ENSG00000205763.13 | 9.77E-05 |
| POLR3C           | ENSG00000186141.8  | 9.81E-05 |



|              |                    |          |
|--------------|--------------------|----------|
| SMG5         | ENSG00000198952.8  | 9.98E-05 |
| RDM1         | ENSG00000278023.4  | 9.98E-05 |
| GP6          | ENSG00000088053.11 | 9.99E-05 |
| MSANTD3      | ENSG00000066697.14 | 1.00E-04 |
| TXNL4A       | ENSG00000141759.14 | 1.01E-04 |
| RP11-258F1.2 | ENSG00000279428.1  | 1.01E-04 |
| SPP1         | ENSG00000118785.13 | 1.02E-04 |
| DHX34        | ENSG00000134815.18 | 1.03E-04 |
| SNRPD1       | ENSG00000167088.10 | 1.03E-04 |
| BRD8         | ENSG00000112983.17 | 1.03E-04 |
| C20orf27     | ENSG00000101220.17 | 1.03E-04 |
| CCL14        | ENSG00000276409.4  | 1.04E-04 |
| NAT9         | ENSG00000109065.11 | 1.04E-04 |
| DDX56        | ENSG00000136271.10 | 1.06E-04 |
| MAMSTR       | ENSG00000176909.11 | 1.08E-04 |
| MED8         | ENSG00000159479.16 | 1.09E-04 |
| ADH4         | ENSG00000198099.8  | 1.11E-04 |
| NUP85        | ENSG00000125450.10 | 1.14E-04 |
| CCDC34       | ENSG00000109881.16 | 1.18E-04 |
| GNG5         | ENSG00000174021.10 | 1.18E-04 |
| CFHR4        | ENSG00000134365.12 | 1.21E-04 |
| NOP58        | ENSG00000055044.10 | 1.22E-04 |
| ITGB1BP1     | ENSG00000119185.12 | 1.24E-04 |
| ARMC10       | ENSG00000170632.13 | 1.27E-04 |
| METTL18      | ENSG00000171806.11 | 1.28E-04 |
| TMEM115      | ENSG00000126062.3  | 1.30E-04 |
| ADAM12       | ENSG00000148848.14 | 1.30E-04 |

|               |                    |          |
|---------------|--------------------|----------|
| NEIL3         | ENSG00000109674.3  | 1.32E-04 |
| SLC16A11      | ENSG00000174326.11 | 1.33E-04 |
| LINC00152     | ENSG00000222041.10 | 1.37E-04 |
| RP4-734G22.3  | ENSG00000272078.1  | 1.38E-04 |
| PARD3         | ENSG00000148498.15 | 1.41E-04 |
| ZFPL1         | ENSG00000162300.11 | 1.41E-04 |
| ACYP1         | ENSG00000119640.8  | 1.41E-04 |
| ZNF133        | ENSG00000125846.15 | 1.43E-04 |
| HAUS6         | ENSG00000147874.10 | 1.44E-04 |
| MYPOP         | ENSG00000176182.5  | 1.44E-04 |
| SLC52A2       | ENSG00000185803.8  | 1.45E-04 |
| N4BP3         | ENSG00000145911.5  | 1.46E-04 |
| ARF4          | ENSG00000168374.10 | 1.46E-04 |
| BAMBI         | ENSG00000095739.10 | 1.50E-04 |
| NUP155        | ENSG00000113569.15 | 1.50E-04 |
| TMEM237       | ENSG00000155755.18 | 1.52E-04 |
| AC083899.3    | ENSG00000204745.3  | 1.52E-04 |
| FAM50A        | ENSG00000071859.14 | 1.53E-04 |
| POLR2G        | ENSG00000168002.11 | 1.54E-04 |
| CCT7          | ENSG00000135624.15 | 1.57E-04 |
| PCAT6         | ENSG00000228288.6  | 1.58E-04 |
| SEC61A1       | ENSG00000058262.9  | 1.61E-04 |
| RP11-641D5.1  | ENSG00000213178.3  | 1.62E-04 |
| CCNB1         | ENSG00000134057.14 | 1.65E-04 |
| FTSJ1         | ENSG00000068438.14 | 1.66E-04 |
| RP11-165F24.2 | ENSG00000235330.2  | 1.66E-04 |
| DUSP12        | ENSG00000081721.11 | 1.66E-04 |

|                   |                    |          |
|-------------------|--------------------|----------|
| CDK1              | ENSG00000170312.15 | 1.67E-04 |
| ATP6V0D2          | ENSG00000147614.3  | 1.68E-04 |
| TTYH3             | ENSG00000136295.14 | 1.69E-04 |
| HDAC2             | ENSG00000196591.11 | 1.70E-04 |
| MYL6B             | ENSG00000196465.10 | 1.70E-04 |
| ILF2              | ENSG00000143621.16 | 1.71E-04 |
| LSM5              | ENSG00000106355.9  | 1.71E-04 |
| HEATR5A           | ENSG00000129493.14 | 1.72E-04 |
| RNF145            | ENSG00000145860.11 | 1.73E-04 |
| C16orf59          | ENSG00000162062.14 | 1.74E-04 |
| EWSR1             | ENSG00000182944.17 | 1.75E-04 |
| CHORDC1           | ENSG00000110172.11 | 1.76E-04 |
| LL22NC03-N14H11.1 | ENSG00000272872.1  | 1.78E-04 |
| SGOL1             | ENSG00000129810.14 | 1.79E-04 |
| SRSF9             | ENSG00000111786.8  | 1.82E-04 |
| AC009005.2        | ENSG00000267751.5  | 1.87E-04 |
| CD58              | ENSG00000116815.15 | 1.87E-04 |
| C20orf24          | ENSG00000101084.16 | 1.89E-04 |
| TRIP13            | ENSG00000071539.13 | 1.90E-04 |
| DHDH              | ENSG00000104808.7  | 1.91E-04 |
| FAM24B            | ENSG00000213185.6  | 1.92E-04 |
| SH3GLB1           | ENSG00000097033.14 | 1.92E-04 |
| ISY1              | ENSG00000240682.9  | 1.95E-04 |
| SNHG3             | ENSG00000242125.3  | 1.95E-04 |
| NUF2              | ENSG00000143228.12 | 1.95E-04 |
| MMP10             | ENSG00000166670.9  | 1.97E-04 |
| ANAPC1            | ENSG00000153107.11 | 2.03E-04 |

|           |                    |          |
|-----------|--------------------|----------|
| DDX11     | ENSG00000013573.16 | 2.03E-04 |
| VPS45     | ENSG00000136631.12 | 2.05E-04 |
| ACKR1     | ENSG00000213088.9  | 2.05E-04 |
| RAMP3     | ENSG00000122679.8  | 2.06E-04 |
| PGBD1     | ENSG00000137338.5  | 2.06E-04 |
| SNRPE     | ENSG00000182004.12 | 2.09E-04 |
| UPB1      | ENSG00000100024.14 | 2.09E-04 |
| CDCA5     | ENSG00000146670.9  | 2.10E-04 |
| CBX1      | ENSG00000108468.14 | 2.12E-04 |
| MAPKAPK5  | ENSG00000089022.13 | 2.16E-04 |
| MCM8      | ENSG00000125885.13 | 2.17E-04 |
| LLPH      | ENSG00000139233.6  | 2.18E-04 |
| REXO4     | ENSG00000148300.11 | 2.19E-04 |
| ADRA2B    | ENSG00000274286.1  | 2.19E-04 |
| ZNF239    | ENSG00000196793.13 | 2.20E-04 |
| CFHR3     | ENSG00000116785.13 | 2.21E-04 |
| LINC01554 | ENSG00000236882.7  | 2.23E-04 |
| E2F8      | ENSG00000129173.12 | 2.24E-04 |
| UBE2D2    | ENSG00000131508.15 | 2.25E-04 |
| NDC1      | ENSG00000058804.11 | 2.25E-04 |
| RAD54L    | ENSG00000085999.11 | 2.27E-04 |
| CBX2      | ENSG00000173894.10 | 2.29E-04 |
| CLIC1     | ENSG00000213719.8  | 2.30E-04 |
| E2F5      | ENSG00000133740.10 | 2.30E-04 |
| INPP5F    | ENSG00000198825.11 | 2.32E-04 |
| MMP1      | ENSG00000196611.4  | 2.32E-04 |
| PPHLN1    | ENSG00000134283.17 | 2.32E-04 |

|                |                    |          |
|----------------|--------------------|----------|
| AURKA          | ENSG00000087586.17 | 2.33E-04 |
| NCBP2          | ENSG00000114503.10 | 2.35E-04 |
| WDR4           | ENSG00000160193.11 | 2.36E-04 |
| SGOL2          | ENSG00000163535.17 | 2.36E-04 |
| PRMT3          | ENSG00000185238.12 | 2.36E-04 |
| WDR77          | ENSG00000116455.13 | 2.37E-04 |
| RP11-1000B6.7  | ENSG00000276724.1  | 2.37E-04 |
| BACE1-AS       | ENSG00000278768.1  | 2.38E-04 |
| RP11-307C12.11 | ENSG00000232093.1  | 2.40E-04 |
| CENPI          | ENSG00000102384.13 | 2.45E-04 |
| RAN            | ENSG00000132341.11 | 2.46E-04 |
| AGPS           | ENSG00000018510.12 | 2.46E-04 |
| XCR1           | ENSG00000173578.7  | 2.46E-04 |
| SSR3           | ENSG00000114850.6  | 2.46E-04 |
| ZNF516         | ENSG00000101493.10 | 2.46E-04 |
| RP11-3P17.5    | ENSG00000269888.1  | 2.47E-04 |
| TOP2B          | ENSG00000077097.13 | 2.47E-04 |
| GPATCH4        | ENSG00000160818.16 | 2.51E-04 |
| KTI12          | ENSG00000198841.3  | 2.56E-04 |
| METTL5         | ENSG00000138382.13 | 2.57E-04 |
| TICRR          | ENSG00000140534.13 | 2.57E-04 |
| TMEM234        | ENSG00000160055.19 | 2.60E-04 |
| VPS72          | ENSG00000163159.11 | 2.60E-04 |
| APOPT1         | ENSG00000256053.7  | 2.61E-04 |
| LRRC42         | ENSG00000116212.14 | 2.63E-04 |
| OLA1P1         | ENSG00000213790.2  | 2.64E-04 |
| THAP3          | ENSG00000041988.15 | 2.66E-04 |

|               |                    |          |
|---------------|--------------------|----------|
| VN1R108P      | ENSG00000230772.1  | 2.68E-04 |
| SLC30A6       | ENSG00000152683.14 | 2.69E-04 |
| DYNC1H1       | ENSG00000197102.10 | 2.71E-04 |
| CSTF2         | ENSG00000101811.13 | 2.73E-04 |
| CDCA8         | ENSG00000134690.10 | 2.74E-04 |
| IER3          | ENSG00000137331.11 | 2.76E-04 |
| ARMC7         | ENSG00000125449.6  | 2.77E-04 |
| UBLCP1        | ENSG00000164332.7  | 2.77E-04 |
| GEMIN2        | ENSG00000092208.16 | 2.77E-04 |
| ATIC          | ENSG00000138363.14 | 2.78E-04 |
| TPRXL         | ENSG00000180438.14 | 2.79E-04 |
| TARS          | ENSG00000113407.13 | 2.80E-04 |
| NEK2          | ENSG00000117650.12 | 2.81E-04 |
| PRR19         | ENSG00000188368.9  | 2.81E-04 |
| GRIN2D        | ENSG00000105464.3  | 2.84E-04 |
| RP11-79P5.10  | ENSG00000255883.1  | 2.84E-04 |
| RP11-286H14.4 | ENSG00000230626.3  | 2.84E-04 |
| ERP29         | ENSG00000089248.6  | 2.85E-04 |
| SRL           | ENSG00000185739.13 | 2.86E-04 |
| CTB-193M12.5  | ENSG00000280206.1  | 2.87E-04 |
| PSMD13        | ENSG00000185627.17 | 2.88E-04 |
| NEU1          | ENSG00000204386.10 | 2.88E-04 |
| COPRS         | ENSG00000172301.10 | 2.90E-04 |
| MKLN1         | ENSG00000128585.17 | 2.92E-04 |
| RP11-817I4.2  | ENSG00000276115.1  | 2.92E-04 |
| NABP2         | ENSG00000139579.12 | 2.92E-04 |
| SRSF2         | ENSG00000161547.14 | 2.93E-04 |

|               |                    |          |
|---------------|--------------------|----------|
| CTC-459F4.9   | ENSG00000281468.1  | 2.94E-04 |
| C20orf196     | ENSG00000171984.14 | 2.95E-04 |
| CTD-3138B18.5 | ENSG00000268516.2  | 2.95E-04 |
| CPS1          | ENSG00000021826.14 | 2.97E-04 |
| MCM3          | ENSG00000112118.17 | 3.00E-04 |
| MBOAT7        | ENSG00000125505.16 | 3.03E-04 |
| PPP2R1A       | ENSG00000105568.17 | 3.03E-04 |
| RP11-159J3.1  | ENSG00000250982.2  | 3.06E-04 |
| RTN3          | ENSG00000133318.13 | 3.07E-04 |
| MCM7          | ENSG00000166508.17 | 3.08E-04 |
| SUPT3H        | ENSG00000196284.13 | 3.09E-04 |
| UQCC3         | ENSG00000204922.4  | 3.10E-04 |
| AC097662.2    | ENSG00000236432.7  | 3.12E-04 |
| MMD           | ENSG00000108960.7  | 3.14E-04 |
| RP11-466H18.1 | ENSG00000244398.1  | 3.15E-04 |
| UBXN2A        | ENSG00000173960.12 | 3.16E-04 |
| CAD           | ENSG00000084774.13 | 3.18E-04 |
| EXO1          | ENSG00000174371.16 | 3.19E-04 |
| SFPQ          | ENSG00000116560.10 | 3.19E-04 |
| AMD1          | ENSG00000123505.14 | 3.20E-04 |
| ARHGAP39      | ENSG00000147799.11 | 3.20E-04 |
| FANCL         | ENSG00000115392.11 | 3.20E-04 |
| AUNIP         | ENSG00000127423.10 | 3.22E-04 |
| PHC2          | ENSG00000134686.16 | 3.23E-04 |
| HSF2          | ENSG00000025156.12 | 3.23E-04 |
| CDC45         | ENSG00000093009.9  | 3.24E-04 |
| HMGA1         | ENSG00000137309.19 | 3.24E-04 |

|               |                    |          |
|---------------|--------------------|----------|
| CEP55         | ENSG00000138180.15 | 3.25E-04 |
| SLC22A1       | ENSG00000175003.12 | 3.25E-04 |
| RP11-783K16.5 | ENSG00000256940.1  | 3.26E-04 |
| ZNF408        | ENSG00000175213.2  | 3.27E-04 |
| CRNKL1        | ENSG00000101343.14 | 3.28E-04 |
| RP11-468E2.6  | ENSG00000259371.2  | 3.29E-04 |
| MITD1         | ENSG00000158411.10 | 3.30E-04 |
| ESCO2         | ENSG00000171320.14 | 3.30E-04 |
| BBS7          | ENSG00000138686.9  | 3.32E-04 |
| CCDC134       | ENSG00000100147.13 | 3.34E-04 |
| TAF11         | ENSG00000064995.16 | 3.34E-04 |
| SMOX          | ENSG00000088826.17 | 3.41E-04 |
| C11orf84      | ENSG00000168005.8  | 3.43E-04 |
| MRPS15        | ENSG00000116898.11 | 3.46E-04 |
| SNRPA         | ENSG00000077312.8  | 3.48E-04 |
| CENPQ         | ENSG00000031691.6  | 3.49E-04 |
| RBM14         | ENSG00000239306.4  | 3.51E-04 |
| ITM2A         | ENSG00000078596.10 | 3.53E-04 |
| CNTN6         | ENSG00000134115.12 | 3.54E-04 |
| MARCKSL1      | ENSG00000175130.6  | 3.54E-04 |
| VPS37C        | ENSG00000167987.10 | 3.58E-04 |
| CTD-2083E4.4  | ENSG00000260774.1  | 3.58E-04 |
| RP4-798A17.5  | ENSG00000225704.2  | 3.59E-04 |
| CDT1          | ENSG00000167513.8  | 3.60E-04 |
| RGS20         | ENSG00000147509.13 | 3.63E-04 |
| PET117        | ENSG00000232838.3  | 3.64E-04 |
| CHCHD2        | ENSG00000106153.12 | 3.64E-04 |



|               |                    |          |
|---------------|--------------------|----------|
| UBAP2L        | ENSG00000143569.18 | 3.64E-04 |
| TBX19         | ENSG00000143178.12 | 3.68E-04 |
| ERCC1         | ENSG00000012061.15 | 3.68E-04 |
| RP11-337N6.3  | ENSG00000280374.1  | 3.70E-04 |
| PIFO          | ENSG00000173947.13 | 3.70E-04 |
| RP11-403I13.8 | ENSG00000272419.5  | 3.72E-04 |
| METTL1        | ENSG00000037897.16 | 3.76E-04 |
| KDELR1        | ENSG00000105438.8  | 3.77E-04 |
| ZBTB40        | ENSG00000184677.16 | 3.79E-04 |
| ANKRD24       | ENSG00000089847.12 | 3.80E-04 |
| SEC14L2       | ENSG00000100003.17 | 3.86E-04 |
| RBFA          | ENSG00000101546.12 | 3.86E-04 |
| RPLP2         | ENSG00000177600.8  | 3.87E-04 |
| CYB5D2        | ENSG00000167740.9  | 3.89E-04 |
| PRC1          | ENSG00000198901.13 | 3.91E-04 |
| RNF24         | ENSG00000101236.16 | 3.97E-04 |
| PRDX1         | ENSG00000117450.13 | 3.97E-04 |
| IFT20         | ENSG00000109083.13 | 4.01E-04 |
| RP11-252E2.2  | ENSG00000261058.1  | 4.03E-04 |
| DLGAP5        | ENSG00000126787.12 | 4.14E-04 |
| TMED7-TICAM2  | ENSG00000251201.8  | 4.15E-04 |
| B4GALT2       | ENSG00000117411.16 | 4.17E-04 |
| HN1           | ENSG00000189159.15 | 4.17E-04 |
| SF3A3         | ENSG00000183431.11 | 4.20E-04 |
| SUPT5H        | ENSG00000196235.13 | 4.22E-04 |
| MYLK2         | ENSG00000101306.10 | 4.22E-04 |
| RP11-177B4.1  | ENSG00000248375.1  | 4.23E-04 |

|               |                    |          |
|---------------|--------------------|----------|
| PAIP1         | ENSG00000172239.13 | 4.26E-04 |
| VPS26A        | ENSG00000122958.14 | 4.27E-04 |
| CAPG          | ENSG00000042493.15 | 4.28E-04 |
| CBX3          | ENSG00000122565.18 | 4.30E-04 |
| TBL1XR1       | ENSG00000177565.15 | 4.30E-04 |
| ETV5          | ENSG00000244405.7  | 4.32E-04 |
| IMPDH1        | ENSG00000106348.16 | 4.33E-04 |
| PLOD2         | ENSG00000152952.11 | 4.33E-04 |
| POLD1         | ENSG00000062822.12 | 4.35E-04 |
| CENPM         | ENSG00000100162.14 | 4.35E-04 |
| APIP          | ENSG00000149089.12 | 4.36E-04 |
| CTD-2240J17.1 | ENSG00000259372.2  | 4.36E-04 |
| ZNF248        | ENSG00000198105.11 | 4.37E-04 |
| ZC2HC1A       | ENSG00000104427.11 | 4.37E-04 |
| SLC39A10      | ENSG00000196950.13 | 4.39E-04 |
| RP11-884K10.7 | ENSG00000271976.1  | 4.43E-04 |
| FFAR3         | ENSG00000185897.6  | 4.43E-04 |
| MKI67         | ENSG00000148773.12 | 4.45E-04 |
| LARS          | ENSG00000133706.17 | 4.46E-04 |
| EIF4A3        | ENSG00000141543.9  | 4.48E-04 |
| DLGAP4        | ENSG00000080845.17 | 4.48E-04 |
| RP11-295M18.6 | ENSG00000272823.1  | 4.48E-04 |
| PSMD1         | ENSG00000173692.12 | 4.49E-04 |
| PRPF39        | ENSG00000185246.17 | 4.53E-04 |
| MAPT          | ENSG00000186868.15 | 4.55E-04 |
| MRGBP         | ENSG00000101189.6  | 4.56E-04 |
| RPIA          | ENSG00000153574.8  | 4.57E-04 |

|            |                    |          |
|------------|--------------------|----------|
| SKA3       | ENSG00000165480.15 | 4.58E-04 |
| FAIM       | ENSG00000158234.12 | 4.59E-04 |
| LMAN2L     | ENSG00000114988.11 | 4.61E-04 |
| FBXO5      | ENSG00000112029.9  | 4.62E-04 |
| NME6       | ENSG00000172113.8  | 4.65E-04 |
| AP000695.4 | ENSG00000233818.1  | 4.65E-04 |
| FAM27E3    | ENSG00000274026.1  | 4.67E-04 |
| B4GALT5    | ENSG00000158470.5  | 4.68E-04 |
| USP39      | ENSG00000168883.19 | 4.69E-04 |
| COA4       | ENSG00000181924.6  | 4.70E-04 |
| EHMT2      | ENSG00000204371.11 | 4.72E-04 |
| TUBG1      | ENSG00000131462.7  | 4.74E-04 |
| DENND5A    | ENSG00000184014.7  | 4.75E-04 |
| RARS       | ENSG00000113643.8  | 4.75E-04 |
| CENPBD1P1  | ENSG00000213753.10 | 4.77E-04 |
| NCDN       | ENSG00000020129.15 | 4.78E-04 |
| MCM10      | ENSG00000065328.16 | 4.78E-04 |
| OIP5       | ENSG00000104147.8  | 4.78E-04 |
| AC116035.1 | ENSG00000227260.1  | 4.79E-04 |
| ZNF789     | ENSG00000198556.13 | 4.79E-04 |
| NUTM2B-AS1 | ENSG00000225484.6  | 4.82E-04 |
| WDHD1      | ENSG00000198554.11 | 4.82E-04 |
| SNX7       | ENSG00000162627.16 | 4.86E-04 |
| DANCR      | ENSG00000226950.6  | 4.86E-04 |
| HOXD9      | ENSG00000128709.11 | 4.86E-04 |
| XRCC3      | ENSG00000126215.13 | 4.88E-04 |
| MRPL36     | ENSG00000171421.12 | 4.91E-04 |

|            |                    |          |
|------------|--------------------|----------|
| TOMM34     | ENSG00000025772.7  | 4.93E-04 |
| CEBPZ      | ENSG00000115816.13 | 4.94E-04 |
| TTLL1      | ENSG00000100271.16 | 4.98E-04 |
| DDOST      | ENSG00000244038.9  | 4.98E-04 |
| AP5Z1      | ENSG00000242802.6  | 5.04E-04 |
| TCF21      | ENSG00000118526.6  | 5.09E-04 |
| RAB35      | ENSG00000111737.11 | 5.09E-04 |
| GNAI3      | ENSG00000065135.8  | 5.13E-04 |
| MRPL35     | ENSG00000132313.14 | 5.14E-04 |
| H2AFZ      | ENSG00000164032.11 | 5.16E-04 |
| RNFT2      | ENSG00000135119.14 | 5.16E-04 |
| POLR3D     | ENSG00000168495.12 | 5.17E-04 |
| GY2        | ENSG00000111713.2  | 5.18E-04 |
| C19orf48   | ENSG00000167747.13 | 5.25E-04 |
| TTLL4      | ENSG00000135912.10 | 5.26E-04 |
| APRT       | ENSG00000198931.10 | 5.27E-04 |
| C8B        | ENSG00000021852.12 | 5.27E-04 |
| DNAJB2     | ENSG00000135924.15 | 5.31E-04 |
| ELOVL1     | ENSG00000066322.12 | 5.32E-04 |
| ENO1       | ENSG00000074800.13 | 5.33E-04 |
| AC012065.1 | ENSG00000279307.1  | 5.33E-04 |
| TMEM79     | ENSG00000163472.18 | 5.34E-04 |
| PPIH       | ENSG00000171960.10 | 5.35E-04 |
| LINC01268  | ENSG00000227502.2  | 5.35E-04 |
| SNRPB2     | ENSG00000125870.10 | 5.35E-04 |
| LINC01296  | ENSG00000244306.9  | 5.41E-04 |
| ANXA10     | ENSG00000109511.10 | 5.43E-04 |

|             |                    |          |
|-------------|--------------------|----------|
| FHL3        | ENSG00000183386.9  | 5.45E-04 |
| TARDBP      | ENSG00000120948.15 | 5.46E-04 |
| APLP2       | ENSG00000084234.16 | 5.48E-04 |
| PDSS1       | ENSG00000148459.15 | 5.49E-04 |
| CES3        | ENSG00000172828.12 | 5.52E-04 |
| FBXO30      | ENSG00000118496.4  | 5.59E-04 |
| RP11-98G7.1 | ENSG00000236947.5  | 5.63E-04 |
| TMEM14C     | ENSG00000111843.13 | 5.65E-04 |
| ERCC6L      | ENSG00000186871.6  | 5.65E-04 |
| CHMP3       | ENSG00000115561.14 | 5.66E-04 |
| ST6GALNAC4  | ENSG00000136840.18 | 5.67E-04 |
| BRD9        | ENSG00000028310.17 | 5.69E-04 |
| KIF11       | ENSG00000138160.5  | 5.72E-04 |
| RCL1        | ENSG00000120158.11 | 5.75E-04 |

---

“Group Cutoff” of Low/High group was defined by “Median”, and the **p(HR)** for each gene was <0.001.

**Supplementary Table 2.** Differential survival gene which have correlation with immune infiltrates in HCC

|                        |             | Purity | B<br>Cell | CD8+T | CD4+ T | Mac   | Neu   | DC    |
|------------------------|-------------|--------|-----------|-------|--------|-------|-------|-------|
| ABCC5                  | partial.cor | -0.142 | 0.343     | 0.308 | 0.341  | 0.418 | 0.377 | 0.429 |
|                        | p           | 0.008  | 0.000     | 0.000 | 0.000  | 0.000 | 0.000 | 0.000 |
| ADAM12                 | partial.cor | -0.401 | 0.251     | 0.255 | 0.481  | 0.499 | 0.394 | 0.387 |
|                        | p           | 0.000  | 0.000     | 0.000 | 0.000  | 0.000 | 0.000 | 0.000 |
| ALS2CR4(TMEM237)       | partial.cor | 0.085  | 0.325     | 0.309 | 0.323  | 0.447 | 0.329 | 0.378 |
| )                      | p           | 0.115  | 0.000     | 0.000 | 0.000  | 0.000 | 0.000 | 0.000 |
| AMD1                   | partial.cor | -0.300 | 0.268     | 0.164 | 0.211  | 0.382 | 0.324 | 0.236 |
|                        | p           | 0.000  | 0.000     | 0.002 | 0.000  | 0.000 | 0.000 | 0.000 |
| ANAPC1                 | partial.cor | 0.071  | 0.294     | 0.197 | 0.305  | 0.354 | 0.372 | 0.344 |
|                        | p           | 0.186  | 0.000     | 0.000 | 0.000  | 0.000 | 0.000 | 0.000 |
| B4GALT5                | partial.cor | -0.164 | 0.298     | 0.270 | 0.440  | 0.481 | 0.428 | 0.447 |
|                        | p           | 0.002  | 0.000     | 0.000 | 0.000  | 0.000 | 0.000 | 0.000 |
| BCL10                  | partial.cor | -0.173 | 0.270     | 0.300 | 0.309  | 0.412 | 0.399 | 0.380 |
|                        | p           | 0.001  | 0.000     | 0.000 | 0.000  | 0.000 | 0.000 | 0.000 |
| C1ORF88 (PIFO)         | partial.cor | -0.091 | 0.229     | 0.242 | 0.231  | 0.448 | 0.246 | 0.323 |
|                        | p           | 0.092  | 0.000     | 0.000 | 0.000  | 0.000 | 0.000 | 0.000 |
| C7ORF68 (HILPDA)       | partial.cor | -0.140 | 0.219     | 0.142 | 0.292  | 0.411 | 0.274 | 0.276 |
|                        | p           | 0.009  | 0.000     | 0.009 | 0.000  | 0.000 | 0.000 | 0.000 |
| C9ORF30<br>(MSANTD3)   | partial.cor | -0.046 | 0.237     | 0.204 | 0.309  | 0.385 | 0.285 | 0.301 |
|                        | p           | 0.394  | 0.000     | 0.000 | 0.000  | 0.000 | 0.000 | 0.000 |
| C9ORF100<br>(ARHGEF39) | partial.cor | 0.222  | 0.388     | 0.306 | 0.167  | 0.291 | 0.180 | 0.346 |
|                        | p           | 0.000  | 0.000     | 0.000 | 0.002  | 0.000 | 0.001 | 0.000 |
| C11ORF84<br>(SPINDOC)  | partial.cor | -0.024 | 0.378     | 0.262 | 0.438  | 0.473 | 0.332 | 0.405 |
|                        | p           | 0.660  | 0.000     | 0.000 | 0.000  | 0.000 | 0.000 | 0.000 |
| C15ORF42 (TICRR)       | partial.cor | 0.131  | 0.468     | 0.306 | 0.257  | 0.377 | 0.268 | 0.395 |
|                        | p           | 0.015  | 0.000     | 0.000 | 0.000  | 0.000 | 0.000 | 0.000 |
| C16ORF59 (TEDC2)       | partial.cor | 0.155  | 0.331     | 0.252 | 0.109  | 0.193 | 0.184 | 0.319 |
|                        | p           | 0.004  | 0.000     | 0.000 | 0.042  | 0.000 | 0.001 | 0.000 |
| CAD                    | partial.cor | 0.125  | 0.319     | 0.152 | 0.309  | 0.322 | 0.244 | 0.309 |
|                        | p           | 0.020  | 0.000     | 0.005 | 0.000  | 0.000 | 0.000 | 0.000 |
| CAPG                   | partial.cor | -0.299 | 0.378     | 0.269 | 0.337  | 0.423 | 0.222 | 0.427 |
|                        | p           | 0.000  | 0.000     | 0.000 | 0.000  | 0.000 | 0.000 | 0.000 |
| CBX1                   | partial.cor | 0.158  | 0.337     | 0.194 | 0.358  | 0.400 | 0.306 | 0.358 |
|                        | p           | 0.003  | 0.000     | 0.000 | 0.000  | 0.000 | 0.000 | 0.000 |
| CBX2                   | partial.cor | -0.030 | 0.279     | 0.267 | 0.192  | 0.247 | 0.232 | 0.292 |
|                        | p           | 0.584  | 0.000     | 0.000 | 0.000  | 0.000 | 0.000 | 0.000 |
| CCNB1                  | partial.cor | 0.110  | 0.418     | 0.275 | 0.149  | 0.305 | 0.215 | 0.342 |
|                        | p           | 0.042  | 0.000     | 0.000 | 0.006  | 0.000 | 0.000 | 0.000 |
| CDC20                  | partial.cor | 0.121  | 0.401     | 0.320 | 0.166  | 0.319 | 0.213 | 0.392 |
|                        | p           | 0.024  | 0.000     | 0.000 | 0.002  | 0.000 | 0.000 | 0.000 |

|         |             |        |       |       |       |       |       |       |
|---------|-------------|--------|-------|-------|-------|-------|-------|-------|
| CDC45   | partial.cor | 0.174  | 0.440 | 0.330 | 0.154 | 0.317 | 0.280 | 0.400 |
|         | p           | 0.001  | 0.000 | 0.000 | 0.004 | 0.000 | 0.000 | 0.000 |
| CDCA2   | partial.cor | 0.106  | 0.421 | 0.350 | 0.198 | 0.370 | 0.312 | 0.393 |
|         | p           | 0.049  | 0.000 | 0.000 | 0.000 | 0.000 | 0.000 | 0.000 |
| CDCA5   | partial.cor | 0.184  | 0.424 | 0.316 | 0.183 | 0.312 | 0.217 | 0.396 |
|         | p           | 0.001  | 0.000 | 0.000 | 0.001 | 0.000 | 0.000 | 0.000 |
| CDCA8   | partial.cor | 0.153  | 0.408 | 0.285 | 0.271 | 0.356 | 0.277 | 0.415 |
|         | p           | 0.004  | 0.000 | 0.000 | 0.000 | 0.000 | 0.000 | 0.000 |
| CDK1    | partial.cor | 0.162  | 0.437 | 0.289 | 0.237 | 0.363 | 0.249 | 0.382 |
|         | p           | 0.002  | 0.000 | 0.000 | 0.000 | 0.000 | 0.000 | 0.000 |
| CDT1    | partial.cor | 0.208  | 0.406 | 0.276 | 0.132 | 0.259 | 0.164 | 0.342 |
|         | p           | 0.000  | 0.000 | 0.000 | 0.015 | 0.000 | 0.002 | 0.000 |
| CENPI   | partial.cor | 0.145  | 0.424 | 0.295 | 0.299 | 0.408 | 0.390 | 0.433 |
|         | p           | 0.007  | 0.000 | 0.000 | 0.000 | 0.000 | 0.000 | 0.000 |
| CENPQ   | partial.cor | 0.241  | 0.240 | 0.255 | 0.232 | 0.282 | 0.271 | 0.348 |
|         | p           | 0.000  | 0.000 | 0.000 | 0.000 | 0.000 | 0.000 | 0.000 |
| CEP55   | partial.cor | 0.001  | 0.475 | 0.367 | 0.345 | 0.500 | 0.345 | 0.473 |
|         | p           | 0.982  | 0.000 | 0.000 | 0.000 | 0.000 | 0.000 | 0.000 |
| CHORDC1 | partial.cor | -0.145 | 0.230 | 0.079 | 0.280 | 0.266 | 0.270 | 0.196 |
|         | p           | 0.007  | 0.000 | 0.144 | 0.000 | 0.000 | 0.000 | 0.000 |
| CLIC1   | partial.cor | -0.083 | 0.307 | 0.287 | 0.156 | 0.343 | 0.180 | 0.356 |
|         | p           | 0.124  | 0.000 | 0.000 | 0.004 | 0.000 | 0.001 | 0.000 |
| DDX11   | partial.cor | 0.119  | 0.327 | 0.220 | 0.288 | 0.321 | 0.242 | 0.302 |
|         | p           | 0.027  | 0.000 | 0.000 | 0.000 | 0.000 | 0.000 | 0.000 |
| DENND5A | partial.cor | -0.200 | 0.289 | 0.249 | 0.385 | 0.396 | 0.454 | 0.427 |
|         | p           | 0.000  | 0.000 | 0.000 | 0.000 | 0.000 | 0.000 | 0.000 |
| DLGAP4  | partial.cor | -0.181 | 0.219 | 0.143 | 0.271 | 0.344 | 0.247 | 0.226 |
|         | p           | 0.001  | 0.000 | 0.008 | 0.000 | 0.000 | 0.000 | 0.000 |
| DLGAP5  | partial.cor | 0.091  | 0.478 | 0.334 | 0.266 | 0.390 | 0.309 | 0.451 |
|         | p           | 0.089  | 0.000 | 0.000 | 0.000 | 0.000 | 0.000 | 0.000 |
| DYNC1H1 | partial.cor | -0.195 | 0.342 | 0.208 | 0.361 | 0.404 | 0.345 | 0.398 |
|         | p           | 0.000  | 0.000 | 0.000 | 0.000 | 0.000 | 0.000 | 0.000 |
| E2F2    | partial.cor | 0.077  | 0.420 | 0.337 | 0.229 | 0.351 | 0.288 | 0.421 |
|         | p           | 0.153  | 0.000 | 0.000 | 0.000 | 0.000 | 0.000 | 0.000 |
| E2F8    | partial.cor | 0.231  | 0.414 | 0.278 | 0.278 | 0.358 | 0.318 | 0.405 |
|         | p           | 0.000  | 0.000 | 0.000 | 0.000 | 0.000 | 0.000 | 0.000 |
| ERCC6L  | partial.cor | 0.172  | 0.458 | 0.300 | 0.255 | 0.378 | 0.294 | 0.420 |
|         | p           | 0.001  | 0.000 | 0.000 | 0.000 | 0.000 | 0.000 | 0.000 |
| ESCO2   | partial.cor | 0.090  | 0.380 | 0.323 | 0.226 | 0.345 | 0.358 | 0.388 |
|         | p           | 0.096  | 0.000 | 0.000 | 0.000 | 0.000 | 0.000 | 0.000 |
| EXO1    | partial.cor | 0.169  | 0.414 | 0.272 | 0.213 | 0.321 | 0.249 | 0.363 |
|         | p           | 0.002  | 0.000 | 0.000 | 0.000 | 0.000 | 0.000 | 0.000 |
| EZH2    | partial.cor | 0.178  | 0.440 | 0.256 | 0.259 | 0.328 | 0.253 | 0.386 |
|         | p           | 0.001  | 0.000 | 0.000 | 0.000 | 0.000 | 0.000 | 0.000 |
| FABP5   | partial.cor | -0.379 | 0.336 | 0.299 | 0.202 | 0.284 | 0.203 | 0.376 |





|        |             |        |       |       |       |       |       |       |
|--------|-------------|--------|-------|-------|-------|-------|-------|-------|
| MKI67  | partial.cor | 0.147  | 0.428 | 0.315 | 0.294 | 0.402 | 0.323 | 0.424 |
|        | p           | 0.006  | 0.000 | 0.000 | 0.000 | 0.000 | 0.000 | 0.000 |
| MMD    | partial.cor | -0.182 | 0.288 | 0.205 | 0.322 | 0.472 | 0.366 | 0.325 |
|        | p           | 0.001  | 0.000 | 0.000 | 0.000 | 0.000 | 0.000 | 0.000 |
| MMP1   | partial.cor | 0.037  | 0.288 | 0.277 | 0.163 | 0.306 | 0.271 | 0.324 |
|        | p           | 0.498  | 0.000 | 0.000 | 0.002 | 0.000 | 0.000 | 0.000 |
| MMP10  | partial.cor | -0.098 | 0.357 | 0.220 | 0.340 | 0.371 | 0.351 | 0.327 |
|        | p           | 0.069  | 0.000 | 0.000 | 0.000 | 0.000 | 0.000 | 0.000 |
| MTMR2  | partial.cor | -0.164 | 0.386 | 0.386 | 0.443 | 0.593 | 0.430 | 0.516 |
|        | p           | 0.002  | 0.000 | 0.000 | 0.000 | 0.000 | 0.000 | 0.000 |
| MYLK2  | partial.cor | -0.112 | 0.291 | 0.246 | 0.243 | 0.317 | 0.238 | 0.284 |
|        | p           | 0.037  | 0.000 | 0.000 | 0.000 | 0.000 | 0.000 | 0.000 |
| N4BP3  | partial.cor | -0.239 | 0.245 | 0.216 | 0.329 | 0.345 | 0.281 | 0.311 |
|        | p           | 0.000  | 0.000 | 0.000 | 0.000 | 0.000 | 0.000 | 0.000 |
| NAP1L1 | partial.cor | -0.130 | 0.350 | 0.365 | 0.183 | 0.395 | 0.214 | 0.396 |
|        | p           | 0.016  | 0.000 | 0.000 | 0.001 | 0.000 | 0.000 | 0.000 |
| NCBP2  | partial.cor | -0.079 | 0.256 | 0.244 | 0.321 | 0.394 | 0.261 | 0.321 |
|        | p           | 0.142  | 0.000 | 0.000 | 0.000 | 0.000 | 0.000 | 0.000 |
| NCDN   | partial.cor | -0.274 | 0.216 | 0.166 | 0.310 | 0.328 | 0.299 | 0.273 |
|        | p           | 0.000  | 0.000 | 0.002 | 0.000 | 0.000 | 0.000 | 0.000 |
| NEIL3  | partial.cor | 0.030  | 0.370 | 0.232 | 0.141 | 0.296 | 0.273 | 0.344 |
|        | p           | 0.580  | 0.000 | 0.000 | 0.009 | 0.000 | 0.000 | 0.000 |
| NEK2   | partial.cor | 0.201  | 0.451 | 0.275 | 0.220 | 0.327 | 0.272 | 0.374 |
|        | p           | 0.000  | 0.000 | 0.000 | 0.000 | 0.000 | 0.000 | 0.000 |
| NUF2   | partial.cor | 0.195  | 0.413 | 0.277 | 0.220 | 0.326 | 0.238 | 0.361 |
|        | p           | 0.000  | 0.000 | 0.000 | 0.000 | 0.000 | 0.000 | 0.000 |
| NUP155 | partial.cor | 0.139  | 0.297 | 0.224 | 0.183 | 0.306 | 0.381 | 0.335 |
|        | p           | 0.010  | 0.000 | 0.000 | 0.001 | 0.000 | 0.000 | 0.000 |
| NUP205 | partial.cor | 0.062  | 0.352 | 0.197 | 0.380 | 0.422 | 0.421 | 0.392 |
|        | p           | 0.253  | 0.000 | 0.000 | 0.000 | 0.000 | 0.000 | 0.000 |
| OIP5   | partial.cor | 0.215  | 0.399 | 0.287 | 0.156 | 0.284 | 0.197 | 0.355 |
|        | p           | 0.000  | 0.000 | 0.000 | 0.004 | 0.000 | 0.000 | 0.000 |
| POLR3D | partial.cor | -0.303 | 0.217 | 0.370 | 0.079 | 0.246 | 0.325 | 0.310 |
|        | p           | 0.000  | 0.000 | 0.000 | 0.144 | 0.000 | 0.000 | 0.000 |
| PPHLN1 | partial.cor | 0.017  | 0.275 | 0.231 | 0.219 | 0.308 | 0.288 | 0.271 |
|        | p           | 0.746  | 0.000 | 0.000 | 0.000 | 0.000 | 0.000 | 0.000 |
| PRC1   | partial.cor | 0.199  | 0.459 | 0.285 | 0.284 | 0.397 | 0.332 | 0.401 |
|        | p           | 0.000  | 0.000 | 0.000 | 0.000 | 0.000 | 0.000 | 0.000 |
| PRPF39 | partial.cor | 0.055  | 0.233 | 0.130 | 0.374 | 0.294 | 0.217 | 0.207 |
|        | p           | 0.312  | 0.000 | 0.016 | 0.000 | 0.000 | 0.000 | 0.000 |
| RAB35  | partial.cor | -0.201 | 0.383 | 0.259 | 0.287 | 0.434 | 0.415 | 0.364 |
|        | p           | 0.000  | 0.000 | 0.000 | 0.000 | 0.000 | 0.000 | 0.000 |
| RAB42  | partial.cor | -0.291 | 0.469 | 0.415 | 0.362 | 0.534 | 0.401 | 0.551 |
|        | p           | 0.000  | 0.000 | 0.000 | 0.000 | 0.000 | 0.000 | 0.000 |
| RAD54L | partial.cor | 0.159  | 0.429 | 0.366 | 0.194 | 0.369 | 0.293 | 0.455 |

|              |             |        |       |       |       |       |       |       |
|--------------|-------------|--------|-------|-------|-------|-------|-------|-------|
|              | p           | 0.003  | 0.000 | 0.000 | 0.000 | 0.000 | 0.000 | 0.000 |
| RAN          | partial.cor | -0.126 | 0.294 | 0.219 | 0.045 | 0.245 | 0.197 | 0.310 |
|              | p           | 0.019  | 0.000 | 0.000 | 0.408 | 0.000 | 0.000 | 0.000 |
| RNF24        | partial.cor | -0.189 | 0.291 | 0.269 | 0.394 | 0.468 | 0.407 | 0.379 |
|              | p           | 0.000  | 0.000 | 0.000 | 0.000 | 0.000 | 0.000 | 0.000 |
| RNF145       | partial.cor | -0.308 | 0.272 | 0.193 | 0.387 | 0.460 | 0.386 | 0.343 |
|              | p           | 0.000  | 0.000 | 0.000 | 0.000 | 0.000 | 0.000 | 0.000 |
| SFPQ         | partial.cor | -0.004 | 0.328 | 0.324 | 0.234 | 0.407 | 0.358 | 0.395 |
|              | p           | 0.948  | 0.000 | 0.000 | 0.000 | 0.000 | 0.000 | 0.000 |
| SFRS2(SRSF2) | partial.cor | 0.045  | 0.305 | 0.166 | 0.200 | 0.233 | 0.235 | 0.259 |
|              | p           | 0.409  | 0.000 | 0.002 | 0.000 | 0.000 | 0.000 | 0.000 |
| SGOL1(SGO1)  | partial.cor | 0.151  | 0.400 | 0.255 | 0.216 | 0.339 | 0.292 | 0.371 |
|              | p           | 0.005  | 0.000 | 0.000 | 0.000 | 0.000 | 0.000 | 0.000 |
| SGOL2(SGO2)  | partial.cor | 0.156  | 0.412 | 0.305 | 0.317 | 0.411 | 0.315 | 0.425 |
|              | p           | 0.004  | 0.000 | 0.000 | 0.000 | 0.000 | 0.000 | 0.000 |
| SH3GLB1      | partial.cor | -0.325 | 0.146 | 0.230 | 0.326 | 0.411 | 0.410 | 0.349 |
|              | p           | 0.000  | 0.007 | 0.000 | 0.000 | 0.000 | 0.000 | 0.000 |
| SKA3         | partial.cor | 0.184  | 0.406 | 0.275 | 0.185 | 0.294 | 0.205 | 0.350 |
|              | p           | 0.001  | 0.000 | 0.000 | 0.001 | 0.000 | 0.000 | 0.000 |
| SLC16A3      | partial.cor | -0.345 | 0.312 | 0.250 | 0.347 | 0.445 | 0.311 | 0.417 |
|              | p           | 0.000  | 0.000 | 0.000 | 0.000 | 0.000 | 0.000 | 0.000 |
| SLC30A6      | partial.cor | 0.027  | 0.161 | 0.152 | 0.289 | 0.334 | 0.377 | 0.294 |
|              | p           | 0.620  | 0.003 | 0.005 | 0.000 | 0.000 | 0.000 | 0.000 |
| SLC39A10     | partial.cor | -0.076 | 0.290 | 0.173 | 0.435 | 0.419 | 0.418 | 0.343 |
|              | p           | 0.157  | 0.000 | 0.001 | 0.000 | 0.000 | 0.000 | 0.000 |
| SPC25        | partial.cor | 0.176  | 0.427 | 0.304 | 0.169 | 0.297 | 0.210 | 0.362 |
|              | p           | 0.001  | 0.000 | 0.000 | 0.002 | 0.000 | 0.000 | 0.000 |
| ST6GALNAC4   | partial.cor | -0.396 | 0.225 | 0.266 | 0.191 | 0.270 | 0.257 | 0.347 |
|              | p           | 0.000  | 0.000 | 0.000 | 0.000 | 0.000 | 0.000 | 0.000 |
| STK39        | partial.cor | -0.149 | 0.208 | 0.127 | 0.340 | 0.310 | 0.294 | 0.211 |
|              | p           | 0.005  | 0.000 | 0.019 | 0.000 | 0.000 | 0.000 | 0.000 |
| TMCO3        | partial.cor | 0.032  | 0.250 | 0.145 | 0.324 | 0.326 | 0.273 | 0.281 |
|              | p           | 0.550  | 0.000 | 0.007 | 0.000 | 0.000 | 0.000 | 0.000 |
| TMEM185B     | partial.cor | -0.125 | 0.244 | 0.156 | 0.278 | 0.364 | 0.308 | 0.302 |
|              | p           | 0.020  | 0.000 | 0.004 | 0.000 | 0.000 | 0.000 | 0.000 |
| TOP2B        | partial.cor | -0.068 | 0.303 | 0.216 | 0.410 | 0.364 | 0.342 | 0.354 |
|              | p           | 0.206  | 0.000 | 0.000 | 0.000 | 0.000 | 0.000 | 0.000 |
| TRIP13       | partial.cor | 0.096  | 0.430 | 0.302 | 0.223 | 0.388 | 0.300 | 0.396 |
|              | p           | 0.074  | 0.000 | 0.000 | 0.000 | 0.000 | 0.000 | 0.000 |
| TTL4         | partial.cor | -0.019 | 0.441 | 0.246 | 0.233 | 0.353 | 0.210 | 0.335 |
|              | p           | 0.729  | 0.000 | 0.000 | 0.000 | 0.000 | 0.000 | 0.000 |
| TTYH3        | partial.cor | -0.227 | 0.227 | 0.023 | 0.423 | 0.337 | 0.293 | 0.284 |
|              | p           | 0.000  | 0.000 | 0.675 | 0.000 | 0.000 | 0.000 | 0.000 |
| UBE2E1       | partial.cor | -0.112 | 0.241 | 0.182 | 0.212 | 0.272 | 0.139 | 0.268 |
|              | p           | 0.037  | 0.000 | 0.001 | 0.000 | 0.000 | 0.010 | 0.000 |

|              |             |        |       |       |       |       |       |       |
|--------------|-------------|--------|-------|-------|-------|-------|-------|-------|
| UPF3B        | partial.cor | 0.060  | 0.201 | 0.155 | 0.258 | 0.246 | 0.253 | 0.284 |
|              | p           | 0.264  | 0.000 | 0.004 | 0.000 | 0.000 | 0.000 | 0.000 |
| VOPP1        | partial.cor | -0.328 | 0.290 | 0.240 | 0.158 | 0.261 | 0.118 | 0.320 |
|              | p           | 0.000  | 0.000 | 0.000 | 0.003 | 0.000 | 0.029 | 0.000 |
| VPS24(CHMP3) | partial.cor | -0.193 | 0.216 | 0.313 | 0.356 | 0.487 | 0.336 | 0.413 |
|              | p           | 0.000  | 0.000 | 0.000 | 0.000 | 0.000 | 0.000 | 0.000 |
| VPS37C       | partial.cor | -0.157 | 0.324 | 0.145 | 0.428 | 0.349 | 0.269 | 0.314 |
|              | p           | 0.003  | 0.000 | 0.007 | 0.000 | 0.000 | 0.000 | 0.000 |
| WDHD1        | partial.cor | 0.140  | 0.466 | 0.355 | 0.375 | 0.456 | 0.419 | 0.486 |
|              | p           | 0.009  | 0.000 | 0.000 | 0.000 | 0.000 | 0.000 | 0.000 |
| XCR1         | partial.cor | -0.359 | 0.260 | 0.254 | 0.283 | 0.268 | 0.321 | 0.300 |
|              | p           | 0.000  | 0.000 | 0.000 | 0.000 | 0.000 | 0.000 | 0.000 |
| ZBTB40       | partial.cor | -0.022 | 0.265 | 0.138 | 0.353 | 0.274 | 0.292 | 0.304 |
|              | p           | 0.679  | 0.000 | 0.010 | 0.000 | 0.000 | 0.000 | 0.000 |
| ZNF239       | partial.cor | -0.113 | 0.253 | 0.211 | 0.273 | 0.402 | 0.227 | 0.293 |
|              | p           | 0.036  | 0.000 | 0.000 | 0.000 | 0.000 | 0.000 | 0.000 |
| ZNF248       | partial.cor | 0.171  | 0.180 | 0.149 | 0.341 | 0.335 | 0.301 | 0.234 |
|              | p           | 0.001  | 0.001 | 0.006 | 0.000 | 0.000 | 0.000 | 0.000 |

“partial.cor” means tumor purity-corrected partial Spearman’s Correlation.

The highly yellow marked genes are the key prognostic biomarker which showed correlation with immune infiltrates in HCC.



|             |             |        |       |       |       |       |       |       |
|-------------|-------------|--------|-------|-------|-------|-------|-------|-------|
| EXO1        | partial.cor | 0.169  | 0.414 | 0.272 | 0.213 | 0.321 | 0.249 | 0.363 |
|             | p           | 0.002  | 0.000 | 0.000 | 0.000 | 0.000 | 0.000 | 0.000 |
| EZH2        | partial.cor | 0.178  | 0.440 | 0.256 | 0.259 | 0.328 | 0.253 | 0.386 |
|             | p           | 0.001  | 0.000 | 0.000 | 0.000 | 0.000 | 0.000 | 0.000 |
| FABP5       | partial.cor | -0.379 | 0.336 | 0.299 | 0.202 | 0.284 | 0.203 | 0.376 |
|             | p           | 0.000  | 0.000 | 0.000 | 0.000 | 0.000 | 0.000 | 0.000 |
| G6PD        | partial.cor | -0.123 | 0.366 | 0.296 | 0.229 | 0.440 | 0.324 | 0.370 |
|             | p           | 0.022  | 0.000 | 0.000 | 0.000 | 0.000 | 0.000 | 0.000 |
| KIF11       | partial.cor | 0.149  | 0.449 | 0.328 | 0.280 | 0.410 | 0.309 | 0.439 |
|             | p           | 0.006  | 0.000 | 0.000 | 0.000 | 0.000 | 0.000 | 0.000 |
| KIFC1       | partial.cor | 0.223  | 0.437 | 0.284 | 0.236 | 0.333 | 0.227 | 0.385 |
|             | p           | 0.000  | 0.000 | 0.000 | 0.000 | 0.000 | 0.000 | 0.000 |
| MCM3        | partial.cor | 0.220  | 0.382 | 0.302 | 0.216 | 0.328 | 0.251 | 0.398 |
|             | p           | 0.000  | 0.000 | 0.000 | 0.000 | 0.000 | 0.000 | 0.000 |
| MCM7        | partial.cor | 0.214  | 0.383 | 0.268 | 0.127 | 0.246 | 0.161 | 0.316 |
|             | p           | 0.000  | 0.000 | 0.000 | 0.018 | 0.000 | 0.003 | 0.000 |
| MCM8        | partial.cor | 0.205  | 0.408 | 0.328 | 0.314 | 0.435 | 0.421 | 0.464 |
|             | p           | 0.000  | 0.000 | 0.000 | 0.000 | 0.000 | 0.000 | 0.000 |
| MKI67       | partial.cor | 0.147  | 0.428 | 0.315 | 0.294 | 0.402 | 0.323 | 0.424 |
|             | p           | 0.006  | 0.000 | 0.000 | 0.000 | 0.000 | 0.000 | 0.000 |
| NEK2        | partial.cor | 0.201  | 0.451 | 0.275 | 0.220 | 0.327 | 0.272 | 0.374 |
|             | p           | 0.000  | 0.000 | 0.000 | 0.000 | 0.000 | 0.000 | 0.000 |
| NUF2        | partial.cor | 0.195  | 0.413 | 0.277 | 0.220 | 0.326 | 0.238 | 0.361 |
|             | p           | 0.000  | 0.000 | 0.000 | 0.000 | 0.000 | 0.000 | 0.000 |
| NUP205      | partial.cor | 0.062  | 0.352 | 0.197 | 0.380 | 0.422 | 0.421 | 0.392 |
|             | p           | 0.253  | 0.000 | 0.000 | 0.000 | 0.000 | 0.000 | 0.000 |
| OIP5        | partial.cor | 0.215  | 0.399 | 0.287 | 0.156 | 0.284 | 0.197 | 0.355 |
|             | p           | 0.000  | 0.000 | 0.000 | 0.004 | 0.000 | 0.000 | 0.000 |
| PRC1        | partial.cor | 0.199  | 0.459 | 0.285 | 0.284 | 0.397 | 0.332 | 0.401 |
|             | p           | 0.000  | 0.000 | 0.000 | 0.000 | 0.000 | 0.000 | 0.000 |
| SGOL1(SGO1) | partial.cor | 0.151  | 0.400 | 0.255 | 0.216 | 0.339 | 0.292 | 0.371 |



**Supplementary Table 4.** The correlation between the key prognostic genes and immune cell marker sets in HCC

|                     |          | C11ORF84    |           | C16ORF59    |           | CAPG        |           |
|---------------------|----------|-------------|-----------|-------------|-----------|-------------|-----------|
|                     |          | partial.cor | partial.p | partial.cor | partial.p | partial.cor | partial.p |
| CD8+T               | CD8A     | 0.135       | *         | 0.157       | **        | 0.227       | ***       |
|                     | CD8B     | 0.169       | **        | 0.236       | ****      | 0.258       | ****      |
| T(General)          | CD3D     | 0.263       | ****      | 0.321       | ****      | 0.423       | ****      |
|                     | CD3E     | 0.201       | **        | 0.207       | **        | 0.351       | ****      |
|                     | CD2      | 0.204       | **        | 0.222       | ***       | 0.405       | ****      |
| B Cell              | CD19     | 0.241       | ****      | 0.244       | ****      | 0.294       | ****      |
|                     | CD79A    | 0.221       | ***       | 0.167       | **        | 0.270       | ****      |
| Monocyte            | CD86     | 0.294       | ****      | 0.254       | ****      | 0.491       | ****      |
|                     | CSF1R    | 0.154       | **        | 0.113       | *         | 0.326       | ****      |
| TAM                 | CCL2     | 0.146       | **        | -0.008      | 0.887     | 0.268       | ****      |
|                     | CD68     | 0.070       | 0.192     | 0.126       | *         | 0.402       | ****      |
|                     | IL10     | 0.231       | ***       | 0.122       | *         | 0.313       | ****      |
| M1                  | NOS2     | -0.125      | *         | -0.178      | **        | -0.098      | 0.070     |
|                     | IRF5     | 0.133       | *         | 0.168       | **        | 0.253       | ****      |
|                     | PTGS2    | 0.216       | ***       | -0.055      | 0.311     | 0.247       | ****      |
| M2                  | CD163    | -0.031      | 0.570     | 0.019       | 0.729     | 0.135       | *         |
|                     | VSIG4    | 0.075       | 0.167     | 0.082       | 0.130     | 0.211       | ***       |
|                     | MS4A4A   | 0.003       | 0.959     | 0.061       | 0.256     | 0.236       | ****      |
| Neutrophil          | CEACAM8  | 0.092       | *         | 0.060       | 0.112     | 0.008       | 0.838     |
|                     | ITGAM    | 0.243       | ****      | 0.316       | ****      | 0.351       | ****      |
|                     | CCR7     | 0.131       | *         | 0.019       | 0.730     | 0.204       | **        |
| Natural killer cell | KIR2DL1  | -0.102      | 0.057     | -0.091      | 0.091     | -0.107      | *         |
|                     | KIR2DL3  | 0.071       | 0.190     | 0.063       | 0.244     | 0.026       | 0.637     |
|                     | KIR2DL4  | 0.090       | 0.095     | 0.168       | **        | 0.084       | 0.118     |
|                     | KIR3DL1  | -0.074      | 0.169     | -0.078      | 0.147     | -0.044      | 0.411     |
|                     | KIR3DL2  | 0.054       | 0.313     | 0.059       | 0.275     | 0.032       | 0.550     |
|                     | KIR3DL3  | 0.043       | 0.428     | 0.026       | 0.629     | 0.027       | 0.623     |
|                     | KIR2DS4  | -0.001      | 0.989     | -0.036      | 0.500     | 0.002       | 0.967     |
| DCs                 | HLA-DPB1 | 0.119       | *         | 0.146       | **        | 0.337       | ****      |
|                     | HLA-DQB1 | 0.097       | 0.071     | 0.164       | **        | 0.278       | ****      |
|                     | HLA-DRA  | 0.082       | 0.130     | 0.119       | *         | 0.288       | ****      |
|                     | HLA-DPA1 | 0.108       | *         | 0.089       | 0.099     | 0.285       | ****      |
|                     | CD1C     | 0.140       | **        | -0.015      | 0.776     | 0.224       | ***       |
|                     | NRP1     | 0.122       | *         | -0.251      | ****      | 0.069       | 0.204     |
|                     | ITGAX    | 0.329       | ****      | 0.268       | ****      | 0.551       | ****      |
| Th1                 | TBX21    | 0.027       | 0.611     | 0.025       | 0.649     | 0.134       | *         |
|                     | STAT1    | 0.166       | **        | 0.091       | 0.092     | 0.284       | ****      |
|                     | STAT4    | 0.190       | **        | 0.172       | **        | 0.349       | ****      |
|                     | IFNG     | 0.188       | **        | 0.255       | ****      | 0.238       | ****      |
|                     | TNF      | 0.280       | ****      | 0.219       | ***       | 0.336       | ****      |
| Th2                 | GATA3    | 0.227       | ***       | 0.130       | *         | 0.325       | ****      |
|                     | STAT5A   | 0.137       | *         | 0.143       | **        | 0.281       | ****      |
|                     | STAT6    | -0.293      | ****      | -0.301      | ****      | -0.101      | 0.062     |
|                     | IL13     | 0.083       | 0.123     | 0.075       | 0.164     | 0.041       | 0.446     |
|                     | BCL6     | -0.027      | 0.619     | -0.187      | **        | -0.196      | **        |

|                  |          |             |           |             |           |             |           |
|------------------|----------|-------------|-----------|-------------|-----------|-------------|-----------|
| Tfh              | IL21     | 0.096       | 0.075     | 0.108       | *         | 0.087       | 0.105     |
| Th17             | STAT3    | -0.083      | 0.125     | -0.225      | ***       | -0.122      | *         |
|                  | IL17A    | -0.029      | 0.591     | -0.040      | 0.457     | 0.045       | 0.409     |
| Treg             | FOXP3    | 0.057       | 0.294     | 0.030       | 0.583     | 0.049       | 0.366     |
|                  | CCR8     | 0.300       | ****      | 0.163       | **        | 0.317       | ****      |
|                  | STAT5B   | -0.167      | **        | -0.323      | ****      | -0.308      | ****      |
|                  | TGFB1    | 0.434       | ****      | 0.167       | **        | 0.486       | ****      |
| Exhausted T Cell | PDCD1    | 0.329       | ****      | 0.286       | ****      | 0.365       | ****      |
|                  | CTLA4    | 0.333       | ****      | 0.366       | ****      | 0.401       | ****      |
|                  | LAG3     | 0.179       | **        | 0.251       | ****      | 0.251       | ****      |
|                  | HAVCR2   | 0.323       | ****      | 0.313       | ****      | 0.535       | ****      |
|                  | GZMB     | 0.065       | 0.227     | 0.088       | 0.103     | 0.117       | *         |
|                  | TIGIT    | 0.272       | ****      | 0.277       | ****      | 0.307       | ****      |
|                  | BTLA     | 0.119       | *         | 0.116       | *         | 0.214       | ***       |
|                  | CD244    | 0.037       | 0.495     | 0.075       | 0.165     | 0.118       | *         |
|                  | CD160    | 0.064       | 0.236     | 0.140       | **        | 0.044       | 0.419     |
|                  | ENTPD1   | 0.387       | ****      | 0.097       | 0.072     | 0.367       | ****      |
|                  | C10ORF54 | 0.151       | **        | 0.116       | *         | 0.357       | ****      |
|                  | CD27     | 0.252       | ****      | 0.295       | ****      | 0.345       | ****      |
|                  | TNFRSF9  | 0.299       | ****      | 0.221       | ***       | 0.219       | ***       |
|                  | MYO7A    | -0.115      | *         | -0.109      | *         | 0.033       | 0.539     |
|                  | WARS     | 0.186       | **        | 0.177       | **        | 0.283       | ****      |
|                  | CXCL13   | 0.197       | **        | 0.230       | ***       | 0.193       | **        |
|                  | LAYN     | 0.142       | **        | -0.017      | 0.760     | 0.233       | ***       |
|                  | PHLDA1   | -0.078      | 0.148     | -0.323      | ****      | -0.033      | 0.547     |
| SNAP47           | -0.112   | *           | -0.001    | 0.980       | -0.006    | 0.908       |           |
| MDSC             | CD14     | -0.391      | ****      | -0.261      | ****      | -0.181      | **        |
|                  | FUT4     | 0.344       | ****      | 0.136       | *         | 0.419       | ****      |
|                  | CD33     | 0.169       | **        | 0.139       | **        | 0.285       | ****      |
| MAIT             | KLRB1    | -0.001      | 0.985     | 0.025       | 0.644     | 0.208       | ***       |
|                  |          | CCNB1       |           | CDC20       |           | CDC45       |           |
|                  |          | partial.cor | partial.p | partial.cor | partial.p | partial.cor | partial.p |
| CD8+T            | CD8A     | 0.165       | **        | 0.226       | ***       | 0.212       | ***       |
|                  | CD8B     | 0.217       | ***       | 0.296       | ****      | 0.262       | ****      |
| T(General)       | CD3D     | 0.321       | ****      | 0.420       | ****      | 0.322       | ****      |
|                  | CD3E     | 0.203       | **        | 0.272       | ****      | 0.234       | ***       |
|                  | CD2      | 0.230       | ***       | 0.296       | ****      | 0.253       | ****      |
| B Cell           | CD19     | 0.224       | ***       | 0.288       | ****      | 0.256       | ****      |
|                  | CD79A    | 0.142       | **        | 0.196       | **        | 0.193       | **        |
| Monocyte         | CD86     | 0.285       | ****      | 0.353       | ****      | 0.328       | ****      |
|                  | CSF1R    | 0.086       | 0.109     | 0.162       | **        | 0.141       | **        |
| TAM              | CCL2     | -0.089      | 0.098     | -0.018      | 0.744     | 0.014       | 0.799     |
|                  | CD68     | 0.183       | **        | 0.199       | **        | 0.122       | *         |
|                  | IL10     | 0.208       | ***       | 0.226       | ***       | 0.200       | **        |
| M1               | NOS2     | -0.198      | **        | -0.212      | ***       | -0.136      | *         |
|                  | IRF5     | 0.170       | **        | 0.172       | **        | 0.144       | **        |
|                  | PTGS2    | -0.025      | 0.644     | -0.015      | 0.777     | 0.018       | 0.742     |
|                  | CD163    | -0.022      | 0.681     | 0.011       | 0.831     | 0.074       | 0.172     |



|                     |          |        |       |        |       |        |       |
|---------------------|----------|--------|-------|--------|-------|--------|-------|
| M2                  | VSIG4    | 0.019  | 0.720 | 0.073  | 0.177 | 0.105  | 0.051 |
|                     | MS4A4A   | 0.021  | 0.694 | 0.070  | 0.195 | 0.108  | *     |
| Neutrophil          | CEACAM8  | 0.129  | **    | 0.101  | **    | 0.123  | **    |
|                     | ITGAM    | 0.249  | ****  | 0.298  | ****  | 0.308  | ****  |
|                     | CCR7     | -0.012 | 0.830 | 0.035  | 0.519 | 0.069  | 0.202 |
| Natural killer cell | KIR2DL1  | -0.117 | *     | -0.132 | *     | -0.100 | 0.065 |
|                     | KIR2DL3  | 0.058  | 0.284 | 0.081  | 0.135 | 0.100  | 0.063 |
|                     | KIR2DL4  | 0.140  | **    | 0.194  | **    | 0.195  | **    |
|                     | KIR3DL1  | -0.107 | *     | -0.093 | 0.085 | -0.050 | 0.357 |
|                     | KIR3DL2  | 0.011  | 0.845 | 0.073  | 0.176 | 0.074  | 0.168 |
|                     | KIR3DL3  | 0.042  | 0.437 | 0.064  | 0.232 | 0.048  | 0.377 |
|                     | KIR2DS4  | -0.040 | 0.464 | -0.045 | 0.405 | 0.025  | 0.639 |
| DCs                 | HLA-DPB1 | 0.128  | *     | 0.192  | **    | 0.169  | **    |
|                     | HLA-DQB1 | 0.139  | **    | 0.195  | **    | 0.187  | **    |
|                     | HLA-DRA  | 0.133  | *     | 0.165  | **    | 0.165  | **    |
|                     | HLA-DPA1 | 0.107  | *     | 0.147  | **    | 0.137  | *     |
|                     | CD1C     | 0.053  | 0.330 | 0.035  | 0.521 | 0.039  | 0.475 |
|                     | NRP1     | -0.111 | *     | -0.141 | **    | -0.122 | *     |
|                     | ITGAX    | 0.289  | ****  | 0.329  | ****  | 0.328  | ****  |
| Th1                 | TBX21    | 0.000  | 0.995 | 0.072  | 0.182 | 0.064  | 0.234 |
|                     | STAT1    | 0.216  | ***   | 0.170  | **    | 0.229  | ***   |
|                     | STAT4    | 0.161  | **    | 0.199  | **    | 0.202  | **    |
|                     | IFNG     | 0.282  | ****  | 0.332  | ****  | 0.304  | ****  |
|                     | TNF      | 0.246  | ****  | 0.281  | ****  | 0.260  | ****  |
| Th2                 | GATA3    | 0.149  | **    | 0.213  | ***   | 0.167  | **    |
|                     | STAT5A   | -0.012 | 0.827 | 0.091  | 0.090 | 0.128  | *     |
|                     | STAT6    | -0.344 | ****  | -0.359 | ****  | -0.284 | ****  |
|                     | IL13     | 0.072  | 0.183 | 0.081  | 0.133 | 0.076  | 0.159 |
| Tfh                 | BCL6     | -0.176 | **    | -0.136 | *     | -0.139 | **    |
|                     | IL21     | 0.167  | **    | 0.143  | **    | 0.151  | **    |
| Th17                | STAT3    | -0.221 | ***   | -0.204 | **    | -0.162 | **    |
|                     | IL17A    | 0.061  | 0.258 | 0.033  | 0.535 | 0.002  | 0.967 |
| Treg                | FOXP3    | 0.061  | 0.255 | 0.075  | 0.166 | 0.098  | 0.070 |
|                     | CCR8     | 0.289  | ****  | 0.275  | ****  | 0.298  | ****  |
|                     | STAT5B   | -0.349 | ****  | -0.371 | ****  | -0.276 | ****  |
|                     | TGFB1    | 0.227  | ***   | 0.228  | ***   | 0.217  | ***   |
| Exhausted T Cell    | PDCD1    | 0.340  | ****  | 0.399  | ****  | 0.347  | ****  |
|                     | CTLA4    | 0.384  | ****  | 0.449  | ****  | 0.407  | ****  |
|                     | LAG3     | 0.265  | ****  | 0.336  | ****  | 0.271  | ****  |
|                     | HAVCR2   | 0.328  | ****  | 0.403  | ****  | 0.363  | ****  |
|                     | GZMB     | 0.071  | 0.187 | 0.127  | *     | 0.113  | *     |
|                     | TIGIT    | 0.295  | ****  | 0.358  | ****  | 0.340  | ****  |
|                     | BTLA     | 0.128  | *     | 0.171  | **    | 0.188  | **    |
|                     | CD244    | 0.085  | 0.116 | 0.130  | *     | 0.097  | 0.071 |
|                     | CD160    | 0.093  | 0.084 | 0.159  | **    | 0.083  | 0.125 |
|                     | ENTPD1   | 0.177  | **    | 0.157  | **    | 0.194  | **    |
|                     | C10ORF54 | 0.012  | 0.831 | 0.072  | 0.180 | 0.095  | 0.078 |
|                     | CD27     | 0.263  | ****  | 0.335  | ****  | 0.315  | ****  |

|                     |          |             |           |             |           |             |           |
|---------------------|----------|-------------|-----------|-------------|-----------|-------------|-----------|
|                     | TNFRSF9  | 0.256       | ****      | 0.277       | ****      | 0.296       | ****      |
|                     | MYO7A    | -0.130      | *         | -0.143      | **        | -0.119      | *         |
|                     | WARS     | 0.213       | ***       | 0.244       | ****      | 0.205       | **        |
|                     | CXCL13   | 0.240       | ****      | 0.291       | ****      | 0.308       | ****      |
|                     | LAYN     | -0.006      | 0.914     | 0.046       | 0.398     | 0.035       | 0.518     |
|                     | PHLDA1   | -0.228      | ***       | -0.258      | ****      | -0.222      | ***       |
|                     | SNAP47   | 0.002       | 0.971     | -0.003      | 0.950     | -0.045      | 0.403     |
| MDSC                | CD14     | -0.401      | ****      | -0.358      | ****      | -0.307      | ****      |
|                     | FUT4     | 0.210       | ***       | 0.181       | **        | 0.190       | **        |
|                     | CD33     | 0.161       | **        | 0.199       | **        | 0.194       | **        |
| MAIT                | KLRB1    | -0.047      | 0.387     | 0.019       | 0.731     | -0.007      | 0.898     |
|                     |          | CDCA8       |           | CDK1        |           | CDT1        |           |
|                     |          | partial.cor | partial.p | partial.cor | partial.p | partial.cor | partial.p |
| CD8+T               | CD8A     | 0.179       | **        | 0.204       | **        | 0.194       | **        |
|                     | CD8B     | 0.192       | **        | 0.222       | ***       | 0.250       | ****      |
| T(General)          | CD3D     | 0.292       | ****      | 0.318       | ****      | 0.325       | ****      |
|                     | CD3E     | 0.194       | **        | 0.239       | ****      | 0.206       | **        |
|                     | CD2      | 0.205       | **        | 0.254       | ****      | 0.233       | ***       |
| B Cell              | CD19     | 0.258       | ****      | 0.294       | ****      | 0.267       | ****      |
|                     | CD79A    | 0.149       | **        | 0.199       | **        | 0.181       | **        |
| Monocyte            | CD86     | 0.286       | ****      | 0.280       | ****      | 0.279       | ****      |
|                     | CSF1R    | 0.092       | 0.088     | 0.077       | 0.151     | 0.103       | 0.056     |
| TAM                 | CCL2     | -0.024      | 0.660     | -0.042      | 0.440     | -0.030      | 0.580     |
|                     | CD68     | 0.102       | 0.058     | 0.142       | **        | 0.161       | **        |
|                     | IL10     | 0.207       | **        | 0.197       | **        | 0.150       | **        |
| M1                  | NOS2     | -0.121      | *         | -0.172      | **        | -0.166      | **        |
|                     | IRF5     | 0.160       | **        | 0.161       | **        | 0.195       | **        |
|                     | PTGS2    | 0.028       | 0.599     | 0.060       | 0.270     | -0.075      | 0.166     |
| M2                  | CD163    | 0.001       | 0.978     | 0.006       | 0.917     | -0.022      | 0.691     |
|                     | VSIG4    | 0.059       | 0.275     | 0.028       | 0.606     | 0.017       | 0.758     |
|                     | MS4A4A   | 0.012       | 0.828     | 0.025       | 0.647     | 0.021       | 0.700     |
| Neutrophil          | CEACAM8  | 0.097       | *         | 0.148       | ***       | 0.067       | 0.078     |
|                     | ITGAM    | 0.279       | ****      | 0.214       | ****      | 0.261       | ****      |
|                     | CCR7     | 0.037       | 0.496     | 0.081       | 0.135     | 0.026       | 0.636     |
| Natural killer cell | KIR2DL1  | -0.088      | 0.103     | -0.115      | *         | -0.107      | *         |
|                     | KIR2DL3  | 0.122       | *         | 0.100       | 0.063     | 0.070       | 0.193     |
|                     | KIR2DL4  | 0.162       | **        | 0.146       | **        | 0.169       | **        |
|                     | KIR3DL1  | -0.016      | 0.770     | -0.056      | 0.303     | -0.090      | 0.095     |
|                     | KIR3DL2  | 0.062       | 0.254     | 0.063       | 0.245     | 0.081       | 0.132     |
|                     | KIR3DL3  | 0.079       | 0.143     | 0.053       | 0.322     | 0.032       | 0.558     |
|                     | KIR2DS4  | -0.028      | 0.607     | -0.001      | 0.992     | -0.022      | 0.686     |
| DCs                 | HLA-DPB1 | 0.096       | 0.074     | 0.116       | *         | 0.169       | **        |
|                     | HLA-DQB1 | 0.124       | *         | 0.123       | *         | 0.188       | **        |
|                     | HLA-DRA  | 0.131       | *         | 0.135       | *         | 0.135       | *         |
|                     | HLA-DPA1 | 0.107       | *         | 0.108       | *         | 0.115       | *         |
|                     | CD1C     | 0.023       | 0.664     | 0.099       | 0.066     | 0.009       | 0.872     |
|                     | NRP1     | -0.024      | 0.656     | -0.012      | 0.827     | -0.170      | **        |
|                     | ITGAX    | 0.289       | ****      | 0.305       | ****      | 0.276       | ****      |

|                  |          |             |           |             |           |             |           |
|------------------|----------|-------------|-----------|-------------|-----------|-------------|-----------|
| Th1              | TBX21    | 0.022       | 0.680     | 0.053       | 0.327     | 0.029       | 0.597     |
|                  | STAT1    | 0.227       | ***       | 0.242       | ****      | 0.144       | **        |
|                  | STAT4    | 0.161       | **        | 0.200       | **        | 0.142       | **        |
|                  | IFNG     | 0.311       | ****      | 0.287       | ****      | 0.295       | ****      |
|                  | TNF      | 0.274       | ****      | 0.247       | ****      | 0.236       | ****      |
| Th2              | GATA3    | 0.181       | **        | 0.199       | **        | 0.149       | **        |
|                  | STAT5A   | 0.008       | 0.884     | 0.033       | 0.544     | 0.108       | *         |
|                  | STAT6    | -0.290      | ****      | -0.285      | ****      | -0.285      | ****      |
|                  | IL13     | 0.091       | 0.093     | 0.039       | 0.473     | 0.050       | 0.354     |
| Tfh              | BCL6     | -0.108      | *         | -0.099      | 0.067     | -0.164      | **        |
|                  | IL21     | 0.181       | **        | 0.184       | **        | 0.130       | *         |
| Th17             | STAT3    | -0.124      | *         | -0.173      | **        | -0.256      | ****      |
|                  | IL17A    | 0.082       | 0.127     | 0.124       | *         | -0.005      | 0.921     |
| Treg             | FOXP3    | 0.173       | **        | 0.121       | *         | 0.074       | 0.170     |
|                  | CCR8     | 0.400       | ****      | 0.386       | ****      | 0.211       | ***       |
|                  | STAT5B   | -0.215      | ***       | -0.229      | ***       | -0.315      | ****      |
|                  | TGFB1    | 0.203       | **        | 0.224       | ***       | 0.205       | **        |
| Exhausted T Cell | PDCD1    | 0.314       | ****      | 0.361       | ****      | 0.364       | ****      |
|                  | CTLA4    | 0.348       | ****      | 0.413       | ****      | 0.390       | ****      |
|                  | LAG3     | 0.239       | ****      | 0.240       | ****      | 0.302       | ****      |
|                  | HAVCR2   | 0.329       | ****      | 0.311       | ****      | 0.317       | ****      |
|                  | GZMB     | 0.022       | 0.680     | 0.075       | 0.164     | 0.101       | 0.061     |
|                  | TIGIT    | 0.313       | ****      | 0.337       | ****      | 0.309       | ****      |
|                  | BTLA     | 0.160       | **        | 0.197       | **        | 0.126       | *         |
|                  | CD244    | 0.046       | 0.393     | 0.073       | 0.179     | 0.086       | 0.110     |
|                  | CD160    | 0.053       | 0.327     | 0.108       | *         | 0.114       | *         |
|                  | ENTPD1   | 0.210       | ***       | 0.281       | ****      | 0.112       | *         |
|                  | C10ORF54 | 0.012       | 0.823     | 0.042       | 0.441     | 0.047       | 0.385     |
|                  | CD27     | 0.245       | ****      | 0.290       | ****      | 0.316       | ****      |
|                  | TNFRSF9  | 0.315       | ****      | 0.306       | ****      | 0.243       | ****      |
|                  | MYO7A    | -0.085      | 0.117     | -0.093      | 0.085     | -0.130      | *         |
|                  | WARS     | 0.178       | **        | 0.168       | **        | 0.166       | **        |
|                  | CXCL13   | 0.303       | ****      | 0.295       | ****      | 0.255       | ****      |
|                  | LAYN     | 0.011       | 0.835     | 0.028       | 0.600     | -0.017      | 0.753     |
|                  | PHLDA1   | -0.267      | ****      | -0.163      | **        | -0.291      | ****      |
| SNAP47           | -0.017   | 0.759       | -0.002    | 0.968       | 0.090     | 0.095       |           |
| MDSC             | CD14     | -0.411      | ****      | -0.405      | ****      | -0.364      | ****      |
|                  | FUT4     | 0.232       | ***       | 0.271       | ****      | 0.161       | **        |
|                  | CD33     | 0.123       | *         | 0.150       | **        | 0.135       | *         |
| MAIT             | KLRB1    | -0.091      | 0.093     | -0.005      | 0.924     | -0.025      | 0.642     |
|                  |          | CLIC1       |           | DLGAP5      |           | E2F8        |           |
|                  |          | partial.cor | partial.p | partial.cor | partial.p | partial.cor | partial.p |
| CD8+T            | CD8A     | 0.209       | ***       | 0.221       | ***       | 0.189       | **        |
|                  | CD8B     | 0.297       | ****      | 0.231       | ***       | 0.169       | **        |
| T(General)       | CD3D     | 0.361       | ****      | 0.325       | ****      | 0.194       | **        |
|                  | CD3E     | 0.282       | ****      | 0.259       | ****      | 0.186       | **        |
|                  | CD2      | 0.289       | ****      | 0.266       | ****      | 0.196       | **        |
| B Cell           | CD19     | 0.241       | ****      | 0.293       | ****      | 0.295       | ****      |

| DC cell             |          |        |       |        |       |        |       |
|---------------------|----------|--------|-------|--------|-------|--------|-------|
| Monocyte            | CD79A    | 0.232  | ***   | 0.219  | ***   | 0.203  | **    |
|                     | CD86     | 0.363  | ****  | 0.337  | ****  | 0.246  | ****  |
|                     | CSF1R    | 0.268  | ****  | 0.144  | **    | 0.084  | 0.121 |
| TAM                 | CCL2     | 0.045  | 0.407 | 0.001  | 0.989 | 0.005  | 0.920 |
|                     | CD68     | 0.382  | ****  | 0.168  | **    | 0.055  | 0.307 |
|                     | IL10     | 0.250  | ****  | 0.258  | ****  | 0.192  | **    |
| M1                  | NOS2     | -0.293 | ****  | -0.116 | *     | -0.065 | 0.232 |
|                     | IRF5     | 0.106  | *     | 0.123  | *     | 0.099  | 0.065 |
|                     | PTGS2    | 0.042  | 0.433 | 0.086  | 0.112 | 0.101  | 0.062 |
| M2                  | CD163    | 0.027  | 0.620 | 0.061  | 0.258 | 0.100  | 0.064 |
|                     | VSIG4    | 0.111  | *     | 0.076  | 0.160 | 0.073  | 0.175 |
|                     | MS4A4A   | 0.138  | *     | 0.067  | 0.214 | 0.041  | 0.445 |
| Neutrophil          | CEACAM8  | 0.118  | **    | 0.108  | **    | 0.084  | *     |
|                     | ITGAM    | 0.198  | ****  | 0.270  | ****  | 0.241  | ****  |
|                     | CCR7     | 0.098  | 0.068 | 0.074  | 0.170 | 0.111  | *     |
| Natural killer cell | KIR2DL1  | -0.021 | 0.694 | -0.108 | *     | -0.098 | 0.068 |
|                     | KIR2DL3  | 0.023  | 0.669 | 0.111  | *     | 0.134  | *     |
|                     | KIR2DL4  | 0.151  | **    | 0.169  | **    | 0.150  | **    |
|                     | KIR3DL1  | -0.048 | 0.378 | -0.020 | 0.708 | 0.000  | 0.996 |
|                     | KIR3DL2  | 0.080  | 0.139 | 0.060  | 0.266 | 0.070  | 0.196 |
|                     | KIR3DL3  | 0.086  | 0.110 | 0.077  | 0.152 | 0.035  | 0.519 |
|                     | KIR2DS4  | 0.005  | 0.930 | -0.031 | 0.572 | -0.024 | 0.658 |
| DCs                 | HLA-DPB1 | 0.274  | ****  | 0.152  | **    | 0.084  | 0.120 |
|                     | HLA-DQB1 | 0.210  | ***   | 0.150  | **    | 0.074  | 0.170 |
|                     | HLA-DRA  | 0.217  | ***   | 0.194  | **    | 0.148  | **    |
|                     | HLA-DPA1 | 0.202  | **    | 0.173  | **    | 0.114  | *     |
|                     | CD1C     | 0.133  | *     | 0.122  | *     | 0.105  | 0.051 |
|                     | NRP1     | 0.083  | 0.122 | 0.030  | 0.582 | 0.021  | 0.696 |
|                     | ITGAX    | 0.274  | ****  | 0.317  | ****  | 0.251  | ****  |
| Th1                 | TBX21    | 0.075  | 0.165 | 0.064  | 0.232 | 0.066  | 0.223 |
|                     | STAT1    | 0.096  | 0.075 | 0.317  | ****  | 0.282  | ****  |
|                     | STAT4    | 0.130  | *     | 0.196  | **    | 0.197  | **    |
|                     | IFNG     | 0.240  | ****  | 0.308  | ****  | 0.272  | ****  |
|                     | TNF      | 0.222  | ***   | 0.297  | ****  | 0.255  | ****  |
| Th2                 | GATA3    | 0.248  | ****  | 0.231  | ***   | 0.168  | **    |
|                     | STAT5A   | 0.212  | ***   | 0.027  | 0.617 | 0.032  | 0.555 |
|                     | STAT6    | -0.189 | **    | -0.270 | ****  | -0.261 | ****  |
|                     | IL13     | -0.115 | *     | 0.088  | 0.101 | 0.122  | *     |
| Tfh                 | BCL6     | -0.020 | 0.706 | -0.101 | 0.062 | -0.069 | 0.201 |
|                     | IL21     | 0.062  | 0.253 | 0.188  | **    | 0.209  | ***   |
| Th17                | STAT3    | -0.188 | **    | -0.147 | **    | -0.035 | 0.513 |
|                     | IL17A    | 0.045  | 0.409 | 0.108  | *     | 0.102  | 0.060 |
| Treg                | FOXP3    | -0.146 | **    | 0.177  | **    | 0.257  | ****  |
|                     | CCR8     | 0.113  | *     | 0.427  | ****  | 0.492  | ****  |
|                     | STAT5B   | -0.364 | ****  | -0.197 | **    | -0.006 | 0.907 |
|                     | TGFB1    | 0.427  | ****  | 0.251  | ****  | 0.108  | *     |
|                     | PDCD1    | 0.390  | ****  | 0.327  | ****  | 0.262  | ****  |
|                     | CTLA4    | 0.402  | ****  | 0.384  | ****  | 0.281  | ****  |

|                     |          |             |           |             |           |             |           |
|---------------------|----------|-------------|-----------|-------------|-----------|-------------|-----------|
| Exhausted T Cell    | LAG3     | 0.231       | ***       | 0.231       | ***       | 0.192       | **        |
|                     | HAVCR2   | 0.389       | ****      | 0.353       | ****      | 0.256       | ****      |
|                     | GZMB     | 0.200       | **        | 0.086       | 0.112     | -0.003      | 0.957     |
|                     | TIGIT    | 0.283       | ****      | 0.365       | ****      | 0.307       | ****      |
|                     | BTLA     | 0.127       | *         | 0.226       | ***       | 0.211       | ***       |
|                     | CD244    | 0.102       | 0.057     | 0.083       | 0.126     | 0.038       | 0.485     |
|                     | CD160    | 0.138       | *         | 0.018       | 0.743     | -0.001      | 0.983     |
|                     | ENTPD1   | 0.179       | **        | 0.277       | ****      | 0.259       | ****      |
|                     | C10ORF54 | 0.191       | **        | 0.048       | 0.379     | 0.007       | 0.902     |
|                     | CD27     | 0.325       | ****      | 0.297       | ****      | 0.240       | ****      |
|                     | TNFRSF9  | 0.187       | **        | 0.363       | ****      | 0.349       | ****      |
|                     | MYO7A    | -0.234      | ***       | -0.136      | *         | -0.058      | 0.286     |
|                     | WARS     | 0.250       | ****      | 0.247       | ****      | 0.122       | *         |
|                     | CXCL13   | 0.053       | 0.327     | 0.290       | ****      | 0.338       | ****      |
|                     | LAYN     | 0.226       | ***       | 0.068       | 0.210     | 0.015       | 0.781     |
|                     | PHLDA1   | 0.041       | 0.446     | -0.157      | **        | -0.187      | **        |
| SNAP47              | 0.066    | 0.224       | -0.001    | 0.986       | -0.040    | 0.462       |           |
| MDSC                | CD14     | -0.393      | ****      | -0.410      | ****      | -0.322      | ****      |
|                     | FUT4     | 0.183       | **        | 0.275       | ****      | 0.261       | ****      |
|                     | CD33     | 0.263       | ****      | 0.199       | **        | 0.138       | *         |
| MAIT                | KLRB1    | 0.149       | **        | -0.016      | 0.774     | -0.053      | 0.325     |
|                     |          | EZH2        |           | FABP5       |           | G6PD        |           |
|                     |          | partial.cor | partial.p | partial.cor | partial.p | partial.cor | partial.p |
| CD8+T               | CD8A     | 0.172       | **        | 0.187       | **        | 0.145       | **        |
|                     | CD8B     | 0.210       | ***       | 0.218       | ***       | 0.196       | **        |
| T(General)          | CD3D     | 0.285       | ****      | 0.279       | ****      | 0.307       | ****      |
|                     | CD3E     | 0.192       | **        | 0.227       | ***       | 0.190       | **        |
|                     | CD2      | 0.227       | ***       | 0.226       | ***       | 0.201       | **        |
| B Cell              | CD19     | 0.262       | ****      | 0.193       | **        | 0.174       | **        |
|                     | CD79A    | 0.163       | **        | 0.245       | ****      | 0.114       | *         |
| Monocyte            | CD86     | 0.282       | ****      | 0.363       | ****      | 0.377       | ****      |
|                     | CSF1R    | 0.088       | 0.104     | 0.221       | ***       | 0.295       | ****      |
| TAM                 | CCL2     | -0.056      | 0.302     | 0.090       | 0.095     | -0.044      | 0.417     |
|                     | CD68     | 0.088       | 0.102     | 0.246       | ****      | 0.301       | ****      |
|                     | IL10     | 0.174       | **        | 0.307       | ****      | 0.196       | **        |
| M1                  | NOS2     | -0.190      | **        | -0.068      | 0.209     | -0.169      | **        |
|                     | IRF5     | 0.233       | ***       | 0.152       | **        | 0.154       | **        |
|                     | PTGS2    | -0.005      | 0.919     | 0.073       | 0.174     | 0.004       | 0.947     |
| M2                  | CD163    | 0.026       | 0.629     | 0.198       | **        | 0.066       | 0.219     |
|                     | VSIG4    | 0.048       | 0.373     | 0.117       | *         | 0.187       | **        |
|                     | MS4A4A   | 0.020       | 0.717     | 0.180       | **        | 0.148       | **        |
| Neutrophil          | CEACAM8  | 0.116       | **        | 0.159       | ***       | 0.071       | 0.062     |
|                     | ITGAM    | 0.241       | ****      | 0.151       | ***       | 0.428       | ****      |
|                     | CCR7     | 0.055       | 0.307     | 0.095       | 0.077     | -0.015      | 0.782     |
| Natural killer cell | KIR2DL1  | -0.049      | 0.364     | 0.035       | 0.520     | -0.091      | 0.091     |
|                     | KIR2DL3  | 0.093       | 0.085     | 0.143       | **        | 0.033       | 0.536     |
|                     | KIR2DL4  | 0.167       | **        | 0.169       | **        | 0.159       | **        |
|                     | KIR3DL1  | -0.049      | 0.365     | 0.085       | 0.114     | -0.079      | 0.141     |

|                  |          |        |        |        |        |        |       |
|------------------|----------|--------|--------|--------|--------|--------|-------|
|                  | KIR3DL2  | 0.075  | 0.166  | 0.117  | *      | 0.029  | 0.587 |
|                  | KIR3DL3  | 0.087  | 0.108  | 0.118  | *      | 0.000  | 0.994 |
|                  | KIR2DS4  | 0.008  | 0.888  | 0.144  | **     | -0.054 | 0.320 |
| DCs              | HLA-DPB1 | 0.106  | 0.050  | 0.211  | ***    | 0.222  | ***   |
|                  | HLA-DQB1 | 0.144  | **     | 0.188  | **     | 0.144  | **    |
|                  | HLA-DRA  | 0.102  | 0.058  | 0.183  | **     | 0.225  | ***   |
|                  | HLA-DPA1 | 0.105  | 0.051  | 0.203  | **     | 0.216  | ***   |
|                  | CD1C     | 0.059  | 0.272  | 0.155  | **     | 0.035  | 0.517 |
|                  | NRP1     | -0.053 | 0.323  | 0.056  | 0.301  | 0.082  | 0.129 |
|                  | ITGAX    | 0.320  | ****   | 0.431  | ****   | 0.381  | ****  |
| Th1              | TBX21    | 0.063  | 0.246  | 0.206  | **     | 0.027  | 0.612 |
|                  | STAT1    | 0.216  | ***    | 0.162  | **     | 0.163  | **    |
|                  | STAT4    | 0.175  | **     | 0.064  | 0.234  | 0.083  | 0.125 |
|                  | IFNG     | 0.280  | ****   | 0.185  | **     | 0.290  | ****  |
|                  | TNF      | 0.268  | ****   | 0.233  | ***    | 0.253  | ****  |
| Th2              | GATA3    | 0.154  | **     | 0.120  | *      | 0.143  | **    |
|                  | STAT5A   | 0.077  | 0.152  | 0.096  | 0.076  | 0.112  | *     |
|                  | STAT6    | -0.264 | ****   | -0.224 | ***    | -0.140 | **    |
|                  | IL13     | 0.062  | 0.250  | 0.017  | 0.753  | -0.023 | 0.670 |
| Tfh              | BCL6     | -0.124 | *      | -0.008 | 0.881  | 0.017  | 0.748 |
|                  | IL21     | 0.176  | **     | 0.092  | 0.087  | 0.120  | *     |
| Th17             | STAT3    | -0.188 | **     | -0.117 | *      | -0.026 | 0.634 |
|                  | IL17A    | 0.038  | 0.481  | 0.097  | 0.072  | -0.024 | 0.651 |
| Treg             | FOXP3    | 0.122  | *      | 0.118  | *      | -0.058 | 0.283 |
|                  | CCR8     | 0.345  | ****   | 0.263  | ****   | 0.264  | ****  |
|                  | STAT5B   | -0.239 | ****   | -0.121 | *      | -0.265 | ****  |
|                  | TGFB1    | 0.197  | **     | 0.335  | ****   | 0.329  | ****  |
| Exhausted T Cell | PDCD1    | 0.310  | ****   | 0.302  | ****   | 0.326  | ****  |
|                  | CTLA4    | 0.351  | ****   | 0.298  | ****   | 0.404  | ****  |
|                  | LAG3     | 0.247  | ****   | 0.227  | ***    | 0.174  | **    |
|                  | HAVCR2   | 0.319  | ****   | 0.391  | ****   | 0.416  | ****  |
|                  | GZMB     | 0.085  | 0.115  | 0.253  | ****   | 0.072  | 0.182 |
|                  | TIGIT    | 0.288  | ****   | 0.307  | ****   | 0.290  | ****  |
|                  | BTLA     | 0.141  | **     | 0.184  | **     | 0.135  | *     |
|                  | CD244    | 0.057  | 0.291  | 0.205  | **     | 0.070  | 0.194 |
|                  | CD160    | 0.069  | 0.202  | 0.122  | *      | 0.039  | 0.467 |
|                  | ENTPD1   | 0.251  | ****   | 0.227  | ***    | 0.151  | **    |
|                  | C10ORF54 | 0.041  | 0.447  | 0.213  | ***    | 0.121  | *     |
|                  | CD27     | 0.257  | ****   | 0.261  | ****   | 0.267  | ****  |
|                  | TNFRSF9  | 0.279  | ****   | 0.267  | ****   | 0.336  | ****  |
|                  | MYO7A    | -0.088 | 0.103  | -0.079 | 0.141  | -0.198 | **    |
|                  | WARS     | 0.168  | **     | 0.255  | ****   | 0.293  | ****  |
|                  | CXCL13   | 0.307  | ****   | 0.159  | **     | 0.095  | 0.079 |
|                  | LAYN     | -0.010 | 0.857  | 0.232  | ***    | 0.057  | 0.293 |
|                  | PHLDA1   | -0.220 | ***    | -0.039 | 0.468  | -0.060 | 0.269 |
| SNAP47           | 0.017    | 0.753  | -0.077 | 0.151  | -0.014 | 0.793  |       |
| MDSC             | CD14     | -0.440 | ****   | -0.252 | ****   | -0.468 | ****  |
|                  | FUT4     | 0.259  | ****   | 0.087  | 0.108  | 0.136  | *     |

|                     |          |             |           |             |           |             |           |
|---------------------|----------|-------------|-----------|-------------|-----------|-------------|-----------|
|                     | CD33     | 0.155       | **        | 0.321       | ****      | 0.271       | ****      |
| MAIT                | KLRB1    | -0.067      | 0.213     | 0.072       | 0.181     | -0.018      | 0.737     |
|                     |          | KIFC1       |           | MCM3        |           | MCM7        |           |
|                     |          | partial.cor | partial.p | partial.cor | partial.p | partial.cor | partial.p |
| CD8+T               | CD8A     | 0.224       | ***       | 0.143       | **        | 0.210       | ***       |
|                     | CD8B     | 0.243       | ****      | 0.190       | **        | 0.281       | ****      |
| T(General)          | CD3D     | 0.302       | ****      | 0.188       | **        | 0.326       | ****      |
|                     | CD3E     | 0.235       | ***       | 0.134       | *         | 0.218       | ***       |
|                     | CD2      | 0.245       | ****      | 0.149       | **        | 0.253       | ****      |
| B Cell              | CD19     | 0.299       | ****      | 0.239       | ****      | 0.230       | ***       |
|                     | CD79A    | 0.225       | ***       | 0.153       | **        | 0.179       | **        |
| Monocyte            | CD86     | 0.270       | ****      | 0.235       | ***       | 0.273       | ****      |
|                     | CSF1R    | 0.082       | 0.128     | 0.073       | 0.176     | 0.110       | *         |
| TAM                 | CCL2     | -0.005      | 0.925     | 0.023       | 0.670     | -0.045      | 0.407     |
|                     | CD68     | 0.117       | *         | 0.070       | 0.192     | 0.099       | 0.065     |
|                     | IL10     | 0.180       | **        | 0.138       | *         | 0.176       | **        |
| M1                  | NOS2     | -0.183      | **        | -0.168      | **        | -0.190      | **        |
|                     | IRF5     | 0.192       | **        | 0.094       | 0.081     | 0.171       | **        |
|                     | PTGS2    | 0.004       | 0.946     | 0.025       | 0.645     | -0.050      | 0.350     |
| M2                  | CD163    | -0.016      | 0.770     | -0.030      | 0.574     | 0.060       | 0.270     |
|                     | VSIG4    | 0.006       | 0.910     | -0.017      | 0.759     | 0.058       | 0.279     |
|                     | MS4A4A   | -0.002      | 0.965     | -0.038      | 0.477     | 0.051       | 0.347     |
| Neutrophil          | CEACAM8  | 0.075       | *         | 0.077       | *         | 0.101       | **        |
|                     | ITGAM    | 0.198       | ****      | 0.205       | ****      | 0.188       | ****      |
|                     | CCR7     | 0.068       | 0.208     | 0.014       | 0.802     | 0.038       | 0.484     |
| Natural killer cell | KIR2DL1  | -0.091      | 0.090     | -0.055      | 0.305     | -0.081      | 0.136     |
|                     | KIR2DL3  | 0.130       | *         | 0.113       | *         | 0.055       | 0.312     |
|                     | KIR2DL4  | 0.174       | **        | 0.128       | *         | 0.149       | **        |
|                     | KIR3DL1  | -0.030      | 0.581     | -0.022      | 0.688     | -0.104      | 0.054     |
|                     | KIR3DL2  | 0.117       | *         | 0.113       | *         | 0.133       | *         |
|                     | KIR3DL3  | 0.092       | 0.088     | 0.071       | 0.189     | 0.004       | 0.947     |
|                     | KIR2DS4  | -0.005      | 0.930     | 0.030       | 0.583     | 0.027       | 0.617     |
| DCs                 | HLA-DPB1 | 0.113       | *         | 0.113       | *         | 0.148       | **        |
|                     | HLA-DQB1 | 0.139       | **        | 0.104       | 0.054     | 0.186       | **        |
|                     | HLA-DRA  | 0.127       | *         | 0.122       | *         | 0.076       | 0.161     |
|                     | HLA-DPA1 | 0.100       | 0.063     | 0.091       | 0.090     | 0.094       | 0.081     |
|                     | CD1C     | 0.100       | 0.063     | 0.066       | 0.224     | 0.098       | 0.068     |
|                     | NRP1     | -0.045      | 0.403     | 0.077       | 0.152     | -0.164      | **        |
|                     | ITGAX    | 0.257       | ****      | 0.185       | **        | 0.260       | ****      |
| Th1                 | TBX21    | 0.069       | 0.201     | 0.026       | 0.631     | 0.114       | *         |
|                     | STAT1    | 0.231       | ***       | 0.204       | **        | 0.189       | **        |
|                     | STAT4    | 0.173       | **        | 0.122       | *         | 0.177       | **        |
|                     | IFNG     | 0.316       | ****      | 0.212       | ***       | 0.272       | ****      |
|                     | TNF      | 0.261       | ****      | 0.188       | **        | 0.252       | ****      |
| Th2                 | GATA3    | 0.166       | **        | 0.106       | *         | 0.157       | **        |
|                     | STAT5A   | 0.046       | 0.395     | 0.074       | 0.172     | 0.169       | **        |
|                     | STAT6    | -0.288      | ****      | -0.241      | ****      | -0.264      | ****      |
|                     | IL13     | 0.073       | 0.178     | 0.021       | 0.691     | 0.051       | 0.343     |

|                  |          |             |           |             |           |             |           |
|------------------|----------|-------------|-----------|-------------|-----------|-------------|-----------|
| Tfh              | BCL6     | -0.105      | 0.051     | -0.101      | 0.061     | -0.134      | *         |
|                  | IL21     | 0.167       | **        | 0.140       | **        | 0.119       | *         |
| Th17             | STAT3    | -0.228      | ***       | -0.186      | **        | -0.311      | ****      |
|                  | IL17A    | 0.093       | 0.086     | 0.094       | 0.082     | 0.038       | 0.483     |
| Treg             | FOXP3    | 0.146       | **        | 0.090       | 0.094     | 0.092       | 0.089     |
|                  | CCR8     | 0.348       | ****      | 0.274       | ****      | 0.207       | **        |
|                  | STAT5B   | -0.193      | **        | -0.154      | **        | -0.264      | ****      |
|                  | TGFB1    | 0.215       | ***       | 0.216       | ***       | 0.171       | **        |
| Exhausted T Cell | PDCD1    | 0.366       | ****      | 0.272       | ****      | 0.324       | ****      |
|                  | CTLA4    | 0.375       | ****      | 0.254       | ****      | 0.358       | ****      |
|                  | LAG3     | 0.281       | ****      | 0.188       | **        | 0.311       | ****      |
|                  | HAVCR2   | 0.276       | ****      | 0.234       | ***       | 0.281       | ****      |
|                  | GZMB     | 0.077       | 0.154     | 0.067       | 0.214     | 0.154       | **        |
|                  | TIGIT    | 0.328       | ****      | 0.214       | ***       | 0.310       | ****      |
|                  | BTLA     | 0.182       | **        | 0.097       | 0.072     | 0.153       | **        |
|                  | CD244    | 0.071       | 0.191     | 0.015       | 0.783     | 0.142       | **        |
|                  | CD160    | 0.102       | 0.059     | 0.034       | 0.531     | 0.104       | 0.055     |
|                  | ENTPD1   | 0.177       | **        | 0.212       | ***       | 0.114       | *         |
|                  | C10ORF54 | 0.021       | 0.692     | 0.075       | 0.166     | 0.048       | 0.378     |
|                  | CD27     | 0.298       | ****      | 0.195       | **        | 0.298       | ****      |
|                  | TNFRSF9  | 0.297       | ****      | 0.250       | ****      | 0.244       | ****      |
|                  | MYO7A    | -0.129      | *         | -0.187      | **        | -0.071      | 0.191     |
|                  | WARS     | 0.154       | **        | 0.147       | **        | 0.166       | **        |
|                  | CXCL13   | 0.292       | ****      | 0.236       | ****      | 0.280       | ****      |
|                  | LAYN     | 0.036       | 0.501     | 0.061       | 0.262     | -0.067      | 0.218     |
| PHLDA1           | -0.229   | ***         | -0.192    | **          | -0.227    | ***         |           |
| SNAP47           | 0.056    | 0.296       | 0.040     | 0.455       | -0.007    | 0.900       |           |
| MDSC             | CD14     | -0.412      | ****      | -0.469      | ****      | -0.301      | ****      |
|                  | FUT4     | 0.228       | ***       | 0.286       | ****      | 0.160       | **        |
|                  | CD33     | 0.139       | **        | 0.102       | 0.057     | 0.176       | **        |
| MAIT             | KLRB1    | -0.033      | 0.544     | -0.085      | 0.114     | -0.006      | 0.914     |
|                  |          | MKI67       |           | NEK2        |           | NUF2        |           |
|                  |          | partial.cor | partial.p | partial.cor | partial.p | partial.cor | partial.p |
| CD8+T            | CD8A     | 0.200       | **        | 0.180       | **        | 0.160       | **        |
|                  | CD8B     | 0.192       | **        | 0.186       | **        | 0.171       | **        |
| T(General)       | CD3D     | 0.298       | ****      | 0.273       | ****      | 0.284       | ****      |
|                  | CD3E     | 0.229       | ***       | 0.211       | ***       | 0.201       | **        |
|                  | CD2      | 0.242       | ****      | 0.216       | ***       | 0.211       | ***       |
| B Cell           | CD19     | 0.251       | ****      | 0.300       | ****      | 0.326       | ****      |
|                  | CD79A    | 0.202       | **        | 0.204       | **        | 0.219       | ***       |
| Monocyte         | CD86     | 0.290       | ****      | 0.258       | ****      | 0.251       | ****      |
|                  | CSF1R    | 0.128       | *         | 0.064       | 0.239     | 0.048       | 0.372     |
| TAM              | CCL2     | -0.046      | 0.398     | -0.048      | 0.379     | -0.021      | 0.696     |
|                  | CD68     | 0.170       | **        | 0.098       | 0.068     | 0.076       | 0.161     |
|                  | IL10     | 0.199       | **        | 0.166       | **        | 0.182       | **        |
| M1               | NOS2     | -0.130      | *         | -0.116      | *         | -0.112      | *         |
|                  | IRF5     | 0.137       | *         | 0.195       | **        | 0.217       | ***       |
|                  | PTGS2    | 0.088       | 0.103     | 0.073       | 0.177     | 0.046       | 0.389     |



|                     |          |        |       |        |        |        |       |
|---------------------|----------|--------|-------|--------|--------|--------|-------|
| M2                  | CD163    | 0.027  | 0.614 | -0.008 | 0.876  | -0.035 | 0.520 |
|                     | VSIG4    | 0.037  | 0.490 | 0.017  | 0.746  | 0.007  | 0.896 |
|                     | MS4A4A   | 0.031  | 0.566 | -0.004 | 0.938  | 0.001  | 0.991 |
| Neutrophil          | CEACAM8  | 0.100  | **    | 0.086  | *      | 0.084  | *     |
|                     | ITGAM    | 0.249  | ****  | 0.230  | ****   | 0.227  | ****  |
|                     | CCR7     | 0.111  | *     | 0.092  | 0.088  | 0.084  | 0.121 |
| Natural killer cell | KIR2DL1  | -0.085 | 0.117 | -0.121 | *      | -0.103 | 0.057 |
|                     | KIR2DL3  | 0.111  | *     | 0.083  | 0.124  | 0.119  | *     |
|                     | KIR2DL4  | 0.117  | *     | 0.136  | *      | 0.159  | **    |
|                     | KIR3DL1  | -0.005 | 0.931 | -0.056 | 0.296  | -0.046 | 0.391 |
|                     | KIR3DL2  | 0.022  | 0.689 | 0.086  | 0.112  | 0.106  | *     |
|                     | KIR3DL3  | 0.057  | 0.293 | 0.046  | 0.396  | 0.056  | 0.304 |
|                     | KIR2DS4  | -0.010 | 0.848 | -0.055 | 0.312  | 0.002  | 0.977 |
| DCs                 | HLA-DPB1 | 0.127  | *     | 0.102  | 0.059  | 0.086  | 0.110 |
|                     | HLA-DQB1 | 0.120  | *     | 0.125  | *      | 0.110  | *     |
|                     | HLA-DRA  | 0.133  | *     | 0.156  | **     | 0.137  | *     |
|                     | HLA-DPA1 | 0.126  | *     | 0.114  | *      | 0.092  | 0.087 |
|                     | CD1C     | 0.087  | 0.107 | 0.110  | *      | 0.086  | 0.112 |
|                     | NRP1     | 0.062  | 0.253 | -0.018 | 0.745  | -0.047 | 0.389 |
|                     | ITGAX    | 0.310  | ****  | 0.277  | ****   | 0.278  | ****  |
| Th1                 | TBX21    | 0.041  | 0.451 | 0.037  | 0.489  | 0.047  | 0.381 |
|                     | STAT1    | 0.215  | ***   | 0.282  | ****   | 0.237  | ****  |
|                     | STAT4    | 0.177  | **    | 0.149  | **     | 0.188  | **    |
|                     | IFNG     | 0.278  | ****  | 0.285  | ****   | 0.272  | ****  |
|                     | TNF      | 0.276  | ****  | 0.258  | ****   | 0.243  | ****  |
| Th2                 | GATA3    | 0.246  | ****  | 0.155  | **     | 0.144  | **    |
|                     | STAT5A   | 0.067  | 0.215 | -0.006 | 0.917  | -0.010 | 0.852 |
|                     | STAT6    | -0.260 | ****  | -0.243 | ****   | -0.263 | ****  |
|                     | IL13     | 0.050  | 0.353 | 0.023  | 0.677  | 0.083  | 0.124 |
| Tfh                 | BCL6     | -0.101 | 0.061 | -0.068 | 0.208  | -0.068 | 0.211 |
|                     | IL21     | 0.198  | **    | 0.173  | **     | 0.134  | *     |
| Th17                | STAT3    | -0.100 | 0.064 | -0.149 | **     | -0.154 | **    |
|                     | IL17A    | 0.081  | 0.132 | 0.101  | 0.062  | 0.109  | *     |
| Treg                | FOXP3    | 0.136  | *     | 0.109  | *      | 0.122  | *     |
|                     | CCR8     | 0.433  | ****  | 0.393  | ****   | 0.365  | ****  |
|                     | STAT5B   | -0.181 | **    | -0.161 | **     | -0.188 | **    |
|                     | TGFB1    | 0.236  | ****  | 0.219  | ***    | 0.187  | **    |
| Exhausted T Cell    | PDCD1    | 0.358  | ****  | 0.319  | ****   | 0.328  | ****  |
|                     | CTLA4    | 0.393  | ****  | 0.371  | ****   | 0.397  | ****  |
|                     | LAG3     | 0.230  | ***   | 0.224  | ***    | 0.238  | ****  |
|                     | HAVCR2   | 0.346  | ****  | 0.278  | ****   | 0.279  | ****  |
|                     | GZMB     | 0.061  | 0.259 | 0.039  | 0.471  | 0.058  | 0.279 |
|                     | TIGIT    | 0.345  | ****  | 0.303  | ****   | 0.310  | ****  |
|                     | BTLA     | 0.211  | ***   | 0.213  | ***    | 0.169  | **    |
|                     | CD244    | 0.071  | 0.188 | 0.037  | 0.493  | 0.053  | 0.330 |
|                     | CD160    | 0.120  | *     | 0.046  | 0.396  | 0.091  | 0.092 |
|                     | ENTPD1   | 0.346  | ****  | 0.230  | ***    | 0.201  | **    |
| C10ORF54            | 0.050    | 0.354  | 0.002 | 0.975  | -0.017 | 0.753  |       |

|                     |          |             |           |             |           |             |           |
|---------------------|----------|-------------|-----------|-------------|-----------|-------------|-----------|
|                     | CD27     | 0.291       | ****      | 0.264       | ****      | 0.262       | ****      |
|                     | TNFRSF9  | 0.345       | ****      | 0.300       | ****      | 0.297       | ****      |
|                     | MYO7A    | -0.109      | *         | -0.103      | 0.056     | -0.119      | *         |
|                     | WARS     | 0.178       | **        | 0.138       | *         | 0.121       | *         |
|                     | CXCL13   | 0.308       | ****      | 0.266       | ****      | 0.284       | ****      |
|                     | LAYN     | 0.078       | 0.151     | 0.035       | 0.521     | 0.033       | 0.536     |
|                     | PHLDA1   | -0.184      | **        | -0.148      | **        | -0.213      | ***       |
|                     | SNAP47   | -0.089      | 0.100     | 0.105       | 0.050     | 0.070       | 0.196     |
| MDSC                | CD14     | -0.429      | ****      | -0.409      | ****      | -0.411      | ****      |
|                     | FUT4     | 0.305       | ****      | 0.230       | ***       | 0.252       | ****      |
|                     | CD33     | 0.152       | **        | 0.136       | *         | 0.133       | *         |
| MAIT                | KLRB1    | -0.032      | 0.550     | -0.039      | 0.473     | -0.033      | 0.545     |
|                     |          | OIP5        |           | PRC1        |           | SGOL1       |           |
|                     |          | partial.cor | partial.p | partial.cor | partial.p | partial.cor | partial.p |
| CD8+T               | CD8A     | 0.208       | ***       | 0.179       | **        | 0.149       | **        |
|                     | CD8B     | 0.226       | ***       | 0.152       | **        | 0.147       | **        |
| T(General)          | CD3D     | 0.312       | ****      | 0.198       | **        | 0.226       | ***       |
|                     | CD3E     | 0.221       | ***       | 0.164       | **        | 0.155       | **        |
|                     | CD2      | 0.247       | ****      | 0.174       | **        | 0.162       | **        |
| B Cell              | CD19     | 0.279       | ****      | 0.245       | ****      | 0.225       | ***       |
|                     | CD79A    | 0.209       | ***       | 0.173       | **        | 0.131       | *         |
| Monocyte            | CD86     | 0.281       | ****      | 0.266       | ****      | 0.278       | ****      |
|                     | CSF1R    | 0.081       | 0.133     | 0.077       | 0.156     | 0.080       | 0.138     |
| TAM                 | CCL2     | 0.019       | 0.726     | 0.007       | 0.903     | -0.026      | 0.635     |
|                     | CD68     | 0.077       | 0.153     | 0.070       | 0.197     | 0.093       | 0.084     |
|                     | IL10     | 0.179       | **        | 0.192       | **        | 0.216       | ***       |
| M1                  | NOS2     | -0.161      | **        | -0.098      | 0.068     | -0.134      | *         |
|                     | IRF5     | 0.165       | **        | 0.183       | **        | 0.123       | *         |
|                     | PTGS2    | 0.004       | 0.943     | 0.100       | 0.064     | 0.039       | 0.470     |
| M2                  | CD163    | 0.025       | 0.637     | 0.015       | 0.778     | 0.057       | 0.294     |
|                     | VSIG4    | 0.039       | 0.470     | 0.047       | 0.383     | 0.066       | 0.219     |
|                     | MS4A4A   | 0.035       | 0.519     | 0.000       | 0.999     | 0.037       | 0.498     |
| Neutrophil          | CEACAM8  | 0.098       | **        | 0.110       | **        | 0.124       | **        |
|                     | ITGAM    | 0.240       | ****      | 0.269       | ****      | 0.278       | ****      |
|                     | CCR7     | 0.044       | 0.410     | 0.051       | 0.350     | 0.022       | 0.678     |
| Natural killer cell | KIR2DL1  | -0.087      | 0.107     | -0.088      | 0.102     | -0.085      | 0.114     |
|                     | KIR2DL3  | 0.077       | 0.151     | 0.107       | *         | 0.121       | *         |
|                     | KIR2DL4  | 0.142       | **        | 0.124       | *         | 0.156       | **        |
|                     | KIR3DL1  | -0.073      | 0.174     | -0.021      | 0.704     | -0.038      | 0.487     |
|                     | KIR3DL2  | 0.081       | 0.131     | 0.049       | 0.366     | 0.056       | 0.304     |
|                     | KIR3DL3  | 0.077       | 0.151     | 0.052       | 0.339     | 0.081       | 0.135     |
|                     | KIR2DS4  | 0.013       | 0.811     | -0.009      | 0.865     | -0.010      | 0.852     |
| DCs                 | HLA-DPB1 | 0.112       | *         | 0.058       | 0.285     | 0.063       | 0.240     |
|                     | HLA-DQB1 | 0.145       | **        | 0.082       | 0.131     | 0.092       | 0.089     |
|                     | HLA-DRA  | 0.117       | *         | 0.098       | 0.069     | 0.126       | *         |
|                     | HLA-DPA1 | 0.093       | 0.086     | 0.085       | 0.116     | 0.097       | 0.071     |
|                     | CD1C     | 0.073       | 0.177     | 0.070       | 0.196     | 0.054       | 0.321     |
|                     | NRP1     | -0.159      | **        | 0.038       | 0.477     | -0.013      | 0.817     |

|                  |          |             |           |             |           |             |           |
|------------------|----------|-------------|-----------|-------------|-----------|-------------|-----------|
|                  | ITGAX    | 0.290       | ****      | 0.287       | ****      | 0.291       | ****      |
| Th1              | TBX21    | 0.055       | 0.306     | -0.007      | 0.894     | 0.008       | 0.882     |
|                  | STAT1    | 0.194       | **        | 0.237       | ****      | 0.218       | ***       |
|                  | STAT4    | 0.226       | ***       | 0.171       | **        | 0.153       | **        |
|                  | IFNG     | 0.283       | ****      | 0.252       | ****      | 0.277       | ****      |
|                  | TNF      | 0.207       | **        | 0.239       | ****      | 0.244       | ****      |
| Th2              | GATA3    | 0.166       | **        | 0.175       | **        | 0.124       | *         |
|                  | STAT5A   | 0.062       | 0.249     | 0.002       | 0.976     | -0.014      | 0.791     |
|                  | STAT6    | -0.324      | ****      | -0.221      | ***       | -0.327      | ****      |
|                  | IL13     | 0.113       | *         | 0.104       | 0.053     | 0.123       | *         |
| Tfh              | BCL6     | -0.184      | **        | -0.093      | 0.084     | -0.067      | 0.214     |
|                  | IL21     | 0.147       | **        | 0.174       | **        | 0.174       | **        |
| Th17             | STAT3    | -0.244      | ****      | -0.127      | *         | -0.136      | *         |
|                  | IL17A    | 0.054       | 0.321     | 0.086       | 0.112     | 0.068       | 0.211     |
| Treg             | FOXP3    | 0.140       | **        | 0.169       | **        | 0.213       | ***       |
|                  | CCR8     | 0.299       | ****      | 0.457       | ****      | 0.429       | ****      |
|                  | STAT5B   | -0.242      | ****      | -0.111      | *         | -0.146      | **        |
|                  | TGFB1    | 0.163       | **        | 0.188       | **        | 0.144       | **        |
| Exhausted T Cell | PDCD1    | 0.340       | ****      | 0.291       | ****      | 0.260       | ****      |
|                  | CTLA4    | 0.356       | ****      | 0.319       | ****      | 0.328       | ****      |
|                  | LAG3     | 0.277       | ****      | 0.176       | **        | 0.197       | **        |
|                  | HAVCR2   | 0.312       | ****      | 0.292       | ****      | 0.301       | ****      |
|                  | GZMB     | 0.080       | 0.136     | 0.004       | 0.941     | 0.027       | 0.611     |
|                  | TIGIT    | 0.304       | ****      | 0.291       | ****      | 0.305       | ****      |
|                  | BTLA     | 0.159       | **        | 0.142       | **        | 0.153       | **        |
|                  | CD244    | 0.086       | 0.112     | -0.008      | 0.888     | 0.039       | 0.465     |
|                  | CD160    | 0.118       | *         | -0.008      | 0.887     | 0.016       | 0.771     |
|                  | ENTPD1   | 0.140       | **        | 0.249       | ****      | 0.195       | **        |
|                  | C10ORF54 | 0.039       | 0.467     | 0.024       | 0.659     | -0.046      | 0.397     |
|                  | CD27     | 0.299       | ****      | 0.224       | ***       | 0.213       | ***       |
|                  | TNFRSF9  | 0.243       | ****      | 0.316       | ****      | 0.330       | ****      |
|                  | MYO7A    | -0.081      | 0.134     | -0.080      | 0.137     | -0.075      | 0.166     |
|                  | WARS     | 0.107       | *         | 0.091       | 0.090     | 0.137       | *         |
|                  | CXCL13   | 0.275       | ****      | 0.278       | ****      | 0.298       | ****      |
|                  | LAYN     | 0.011       | 0.836     | 0.037       | 0.496     | -0.010      | 0.853     |
|                  | PHLDA1   | -0.278      | ****      | -0.185      | **        | -0.207      | **        |
|                  | SNAP47   | -0.037      | 0.493     | -0.050      | 0.359     | -0.061      | 0.259     |
| MDSC             | CD14     | -0.290      | ****      | -0.401      | ****      | -0.396      | ****      |
|                  | FUT4     | 0.179       | **        | 0.285       | ****      | 0.206       | **        |
|                  | CD33     | 0.155       | **        | 0.117       | *         | 0.161       | **        |
| MAIT             | KLRB1    | 0.004       | 0.946     | -0.105      | 0.051     | -0.096      | 0.076     |
|                  |          | SKA3        |           | SPC25       |           | TMC03       |           |
|                  |          | partial.cor | partial.p | partial.cor | partial.p | partial.cor | partial.p |
| CD8+T            | CD8A     | 0.213       | ***       | 0.216       | ***       | 0.039       | 0.472     |
|                  | CD8B     | 0.233       | ***       | 0.260       | ****      | -0.027      | 0.618     |
| T(General)       | CD3D     | 0.324       | ****      | 0.353       | ****      | 0.056       | 0.304     |
|                  | CD3E     | 0.237       | ****      | 0.255       | ****      | 0.094       | 0.083     |
|                  | CD2      | 0.249       | ****      | 0.262       | ****      | 0.095       | 0.079     |

|                     |          |        |       |        |       |        |       |
|---------------------|----------|--------|-------|--------|-------|--------|-------|
| B Cell              | CD19     | 0.249  | ****  | 0.277  | ****  | 0.149  | **    |
|                     | CD79A    | 0.211  | ***   | 0.213  | ***   | 0.133  | *     |
| Monocyte            | CD86     | 0.278  | ****  | 0.295  | ****  | 0.163  | **    |
|                     | CSF1R    | 0.081  | 0.131 | 0.102  | 0.057 | 0.107  | *     |
| TAM                 | CCL2     | -0.047 | 0.383 | -0.054 | 0.317 | 0.122  | *     |
|                     | CD68     | 0.121  | *     | 0.169  | **    | 0.080  | 0.137 |
|                     | IL10     | 0.166  | **    | 0.175  | **    | 0.172  | **    |
| M1                  | NOS2     | -0.182 | **    | -0.187 | **    | 0.060  | 0.267 |
|                     | IRF5     | 0.184  | **    | 0.150  | **    | 0.114  | *     |
|                     | PTGS2    | -0.005 | 0.931 | -0.050 | 0.354 | 0.259  | ****  |
| M2                  | CD163    | -0.011 | 0.842 | -0.007 | 0.897 | -0.010 | 0.855 |
|                     | VSIG4    | 0.010  | 0.856 | 0.032  | 0.553 | 0.094  | 0.080 |
|                     | MS4A4A   | 0.015  | 0.783 | 0.044  | 0.420 | 0.031  | 0.570 |
| Neutrophil          | CEACAM8  | 0.091  | *     | 0.101  | **    | 0.025  | 0.519 |
|                     | ITGAM    | 0.216  | ****  | 0.244  | ****  | 0.227  | ****  |
|                     | CCR7     | 0.074  | 0.168 | 0.035  | 0.515 | 0.139  | **    |
| Natural killer cell | KIR2DL1  | -0.082 | 0.127 | -0.093 | 0.084 | -0.036 | 0.505 |
|                     | KIR2DL3  | 0.120  | *     | 0.120  | *     | -0.024 | 0.663 |
|                     | KIR2DL4  | 0.149  | **    | 0.194  | **    | -0.030 | 0.580 |
|                     | KIR3DL1  | -0.054 | 0.319 | -0.043 | 0.429 | 0.033  | 0.542 |
|                     | KIR3DL2  | 0.103  | 0.057 | 0.101  | 0.060 | -0.110 | *     |
|                     | KIR3DL3  | 0.110  | *     | 0.065  | 0.232 | 0.043  | 0.428 |
|                     | KIR2DS4  | 0.012  | 0.829 | 0.011  | 0.833 | -0.057 | 0.289 |
| DCs                 | HLA-DPB1 | 0.119  | *     | 0.143  | **    | 0.076  | 0.157 |
|                     | HLA-DQB1 | 0.131  | *     | 0.153  | **    | 0.001  | 0.990 |
|                     | HLA-DRA  | 0.120  | *     | 0.146  | **    | 0.136  | *     |
|                     | HLA-DPA1 | 0.098  | 0.069 | 0.117  | *     | 0.136  | *     |
|                     | CD1C     | 0.068  | 0.210 | 0.080  | 0.140 | 0.166  | **    |
|                     | NRP1     | -0.084 | 0.119 | -0.093 | 0.084 | 0.117  | *     |
|                     | ITGAX    | 0.287  | ****  | 0.287  | ****  | 0.181  | **    |
| Th1                 | TBX21    | 0.068  | 0.210 | 0.071  | 0.188 | -0.123 | *     |
|                     | STAT1    | 0.221  | ***   | 0.270  | ****  | 0.216  | ***   |
|                     | STAT4    | 0.213  | ***   | 0.215  | ***   | 0.168  | **    |
|                     | IFNG     | 0.296  | ****  | 0.324  | ****  | 0.006  | 0.914 |
|                     | TNF      | 0.249  | ****  | 0.230  | ***   | 0.190  | **    |
| Th2                 | GATA3    | 0.188  | **    | 0.145  | **    | 0.183  | **    |
|                     | STAT5A   | 0.066  | 0.220 | 0.082  | 0.126 | -0.090 | 0.094 |
|                     | STAT6    | -0.295 | ****  | -0.318 | ****  | -0.108 | *     |
|                     | IL13     | 0.076  | 0.162 | 0.052  | 0.339 | 0.077  | 0.154 |
| Tfh                 | BCL6     | -0.103 | 0.057 | -0.127 | *     | -0.116 | *     |
|                     | IL21     | 0.181  | **    | 0.185  | **    | 0.066  | 0.222 |
| Th17                | STAT3    | -0.245 | ****  | -0.224 | ***   | 0.173  | **    |
|                     | IL17A    | 0.093  | 0.085 | 0.061  | 0.261 | 0.049  | 0.365 |
| Treg                | FOXP3    | 0.096  | 0.076 | 0.080  | 0.136 | 0.110  | *     |
|                     | CCR8     | 0.306  | ****  | 0.290  | ****  | 0.337  | ****  |
|                     | STAT5B   | -0.249 | ****  | -0.272 | ****  | -0.018 | 0.735 |
|                     | TGFB1    | 0.196  | **    | 0.208  | **    | 0.283  | ****  |
|                     | PDCD1    | 0.368  | ****  | 0.357  | ****  | 0.134  | *     |

|                  |          |             |           |        |       |        |       |
|------------------|----------|-------------|-----------|--------|-------|--------|-------|
| Exhausted T Cell | CTLA4    | 0.406       | ****      | 0.411  | ****  | 0.102  | 0.058 |
|                  | LAG3     | 0.294       | ****      | 0.280  | ****  | -0.096 | 0.076 |
|                  | HAVCR2   | 0.299       | ****      | 0.329  | ****  | 0.211  | ***   |
|                  | GZMB     | 0.103       | 0.057     | 0.131  | *     | -0.180 | **    |
|                  | TIGIT    | 0.319       | ****      | 0.319  | ****  | 0.128  | *     |
|                  | BTLA     | 0.178       | **        | 0.178  | **    | 0.124  | *     |
|                  | CD244    | 0.086       | 0.109     | 0.108  | *     | -0.133 | *     |
|                  | CD160    | 0.143       | **        | 0.108  | *     | -0.057 | 0.291 |
|                  | ENTPD1   | 0.188       | **        | 0.182  | **    | 0.288  | ****  |
|                  | C10ORF54 | -0.009      | 0.865     | 0.050  | 0.354 | 0.044  | 0.419 |
|                  | CD27     | 0.301       | ****      | 0.307  | ****  | 0.057  | 0.292 |
|                  | TNFRSF9  | 0.273       | ****      | 0.285  | ****  | 0.167  | **    |
|                  | MYO7A    | -0.115      | *         | -0.139 | **    | 0.093  | 0.084 |
|                  | WARS     | 0.131       | *         | 0.177  | **    | 0.031  | 0.563 |
|                  | CXCL13   | 0.282       | ****      | 0.272  | ****  | 0.096  | 0.075 |
|                  | LAYN     | 0.015       | 0.786     | 0.019  | 0.729 | 0.109  | *     |
|                  | PHLDA1   | -0.220      | ***       | -0.213 | ***   | -0.154 | **    |
|                  | SNAP47   | 0.008       | 0.882     | 0.021  | 0.702 | -0.040 | 0.461 |
| MDSC             | CD14     | -0.411      | ****      | -0.369 | ****  | -0.233 | ***   |
|                  | FUT4     | 0.204       | **        | 0.221  | ***   | 0.371  | ****  |
|                  | CD33     | 0.161       | **        | 0.158  | **    | 0.062  | 0.250 |
| MAIT             | KLRB1    | -0.003      | 0.954     | 0.002  | 0.970 | 0.004  | 0.947 |
|                  |          | TRIP13      |           |        |       |        |       |
|                  |          | partial.cor | partial.p |        |       |        |       |
| CD8+T            | CD8A     | 0.138       | *         |        |       |        |       |
|                  | CD8B     | 0.154       | **        |        |       |        |       |
| T(General)       | CD3D     | 0.260       | ****      |        |       |        |       |
|                  | CD3E     | 0.167       | **        |        |       |        |       |
|                  | CD2      | 0.185       | **        |        |       |        |       |
| B Cell           | CD19     | 0.228       | ***       |        |       |        |       |
|                  | CD79A    | 0.141       | **        |        |       |        |       |
| Monocyte         | CD86     | 0.325       | ****      |        |       |        |       |
|                  | CSF1R    | 0.132       | *         |        |       |        |       |
| TAM              | CCL2     | -0.006      | 0.915     |        |       |        |       |
|                  | CD68     | 0.170       | **        |        |       |        |       |
|                  | IL10     | 0.197       | **        |        |       |        |       |
| M1               | NOS2     | -0.148      | **        |        |       |        |       |
|                  | IRF5     | 0.187       | **        |        |       |        |       |
|                  | PTGS2    | 0.039       | 0.468     |        |       |        |       |
| M2               | CD163    | 0.018       | 0.741     |        |       |        |       |
|                  | VSIG4    | 0.064       | 0.234     |        |       |        |       |
|                  | MS4A4A   | 0.043       | 0.428     |        |       |        |       |
| Neutrophil       | CEACAM8  | 0.087       | *         |        |       |        |       |
|                  | ITGAM    | 0.365       | ****      |        |       |        |       |
|                  | CCR7     | -0.007      | 0.890     |        |       |        |       |
|                  | KIR2DL1  | -0.082      | 0.128     |        |       |        |       |
|                  | KIR2DL3  | 0.102       | 0.058     |        |       |        |       |
|                  | KIR2DL4  | 0.128       | *         |        |       |        |       |

|                     |          |        |       |  |  |  |
|---------------------|----------|--------|-------|--|--|--|
| Natural killer cell | KIR3DL1  | -0.084 | 0.119 |  |  |  |
|                     | KIR3DL2  | 0.046  | 0.394 |  |  |  |
|                     | KIR3DL3  | 0.035  | 0.522 |  |  |  |
|                     | KIR2DS4  | -0.003 | 0.955 |  |  |  |
| DCs                 | HLA-DPB1 | 0.114  | *     |  |  |  |
|                     | HLA-DQB1 | 0.116  | *     |  |  |  |
|                     | HLA-DRA  | 0.137  | *     |  |  |  |
|                     | HLA-DPA1 | 0.105  | 0.051 |  |  |  |
|                     | CD1C     | 0.056  | 0.300 |  |  |  |
|                     | NRP1     | -0.019 | 0.723 |  |  |  |
|                     | ITGAX    | 0.352  | ****  |  |  |  |
| Th1                 | TBX21    | -0.020 | 0.714 |  |  |  |
|                     | STAT1    | 0.231  | ***   |  |  |  |
|                     | STAT4    | 0.177  | **    |  |  |  |
|                     | IFNG     | 0.237  | ****  |  |  |  |
|                     | TNF      | 0.275  | ****  |  |  |  |
| Th2                 | GATA3    | 0.162  | **    |  |  |  |
|                     | STAT5A   | 0.038  | 0.480 |  |  |  |
|                     | STAT6    | -0.242 | ****  |  |  |  |
|                     | IL13     | 0.027  | 0.615 |  |  |  |
| Tfh                 | BCL6     | -0.135 | *     |  |  |  |
|                     | IL21     | 0.129  | *     |  |  |  |
| Th17                | STAT3    | -0.138 | *     |  |  |  |
|                     | IL17A    | 0.047  | 0.385 |  |  |  |
| Treg                | FOXP3    | 0.071  | 0.187 |  |  |  |
|                     | CCR8     | 0.357  | ****  |  |  |  |
|                     | STAT5B   | -0.232 | ***   |  |  |  |
|                     | TGFB1    | 0.247  | ****  |  |  |  |
| Exhausted T Cell    | PDCD1    | 0.288  | ****  |  |  |  |
|                     | CTLA4    | 0.383  | ****  |  |  |  |
|                     | LAG3     | 0.176  | **    |  |  |  |
|                     | HAVCR2   | 0.370  | ****  |  |  |  |
|                     | GZMB     | 0.045  | 0.404 |  |  |  |
|                     | TIGIT    | 0.303  | ****  |  |  |  |
|                     | BTLA     | 0.117  | *     |  |  |  |
|                     | CD244    | 0.060  | 0.266 |  |  |  |
|                     | CD160    | 0.034  | 0.531 |  |  |  |
|                     | ENTPD1   | 0.215  | ***   |  |  |  |
|                     | C10ORF54 | 0.066  | 0.219 |  |  |  |
|                     | CD27     | 0.234  | ***   |  |  |  |
|                     | TNFRSF9  | 0.324  | ****  |  |  |  |
|                     | MYO7A    | -0.149 | **    |  |  |  |
|                     | WARS     | 0.161  | **    |  |  |  |
|                     | CXCL13   | 0.209  | ***   |  |  |  |
|                     | LAYN     | 0.015  | 0.786 |  |  |  |
|                     | PHLDA1   | -0.184 | **    |  |  |  |
| SNAP47              | -0.073   | 0.176  |       |  |  |  |
|                     | CD14     | -0.434 | ****  |  |  |  |

|      |       |        |       |  |  |  |  |
|------|-------|--------|-------|--|--|--|--|
| MDSC | FUT4  | 0.252  | ****  |  |  |  |  |
|      | CD33  | 0.171  | **    |  |  |  |  |
| MAIT | KLRB1 | -0.074 | 0.173 |  |  |  |  |

**Supplementary Table 5** The present research state of 36 key genes.

| Key Genes         | Main correlation with HCC                                              | References (PMID)                |
|-------------------|------------------------------------------------------------------------|----------------------------------|
| C11ORF84(SPINDOC) | No reports                                                             |                                  |
| C16ORF59(TEDC2)   | No reports                                                             |                                  |
| CAPG              | Cellular invasion, migration and tumor prognosis                       | 29970516                         |
| CBX1              | Oncogenic activities<br>prognostic biomarker                           | 30031230<br>30481161             |
| CCNB1             | Prognostic biomarker                                                   | 31043166<br>30363964             |
| CDC20             | Prognostic biomarker                                                   | 30363964                         |
| CDC45             | Prognostic biomarker                                                   | 31011256                         |
| CDCA5             | Prognostic biomarker<br>promote oncogenesis                            | 31205541<br>30497429<br>29503564 |
| CDCA8             | Prognostic biomarker                                                   | 30746803                         |
| CDK1              | Prognostic biomarker                                                   | 31043166<br>30746803             |
| CDT1              | AFP-related diagnostic biomarkers                                      | 29442275                         |
| CEP55             | Prognostic biomarker                                                   | 31011256<br>31289599             |
| CLIC1             | Migration and invasion                                                 | 24989236                         |
| DLGAP5            | Cell proliferation and tumorigenesis                                   | 24324629                         |
| E2F8              | Prognostic biomarker, cell proliferation                               | 30863181<br>20068156             |
| EXO1              | Prognostic biomarker                                                   | 30328366                         |
| EZH2              | Prognostic biomarker                                                   | 31011256<br>31289599             |
| FABP5             | Promote angiogenesis<br>induction of epithelial-mesenchymal transition | 29957468<br>28374947             |
| G6PD              | Induction of epithelial-mesenchymal transition                         | 29471502                         |
| KIF11             | Prognostic biomarker                                                   | 28901309                         |
| KIFC1             | Prognostic biomarker                                                   | 28901309                         |
| MCM3              | Prognostic biomarker                                                   | 30363964                         |
| MCM7              | Prognostic biomarker<br>AFP-related diagnostic biomarkers              | 31011256<br>29442275             |



|             |                                                                             |                                  |
|-------------|-----------------------------------------------------------------------------|----------------------------------|
| MCM8        | Occurrence and development                                                  | 30546424                         |
| MKI67       | Prognostic biomarker,<br>proliferation                                      | 29692627<br>30532594             |
| NEK2        | Induction of epithelial-<br>mesenchymal transition,<br>prognostic biomarker | 29399700<br>30145571<br>3056273  |
| NUF2        | Prognostic biomarker                                                        | 30653265                         |
| NUP205      | No reports                                                                  |                                  |
| OIP5        | Prognostic biomarker<br>growth and metastasis                               | 30746803<br>28184024             |
| PRC1        | Prognostic biomarker<br>early recurrence                                    | 31043166<br>30746803<br>26941395 |
| SGOL1(SGO1) | Prognostic biomarker                                                        | 29467456                         |
| SGOL2(SGO2) | No reports                                                                  |                                  |
| SKA3        | No reports                                                                  |                                  |
| SPC25       | Wnt-regulated recurrence-<br>associated gene                                | 26941395                         |
| TMCO3       | No reports                                                                  |                                  |
| TRIP13      | Tumor promoter                                                              | 30542731                         |

---

30/36 genes were reported that had correlation with HCC, and 6/36 genes were not reported in the HCC related researches.



Supplementary Table 6 The sequence of SiRNA and primer of qPCR

| For SiRNA       | Forward                 | Reverse                 |
|-----------------|-------------------------|-------------------------|
| SiRNA-NC        | UUCUCCGAACGUGUCACGUTT   | ACGUGACACGUUCGGAGAATT   |
| NUP205-SiRNA-1  | GCGGUAAAUUCGGCUGCUATT   | UAGCAGCCGAAUUUACCGCTT   |
| NUP205-SiRNA-2  | GCCAGUCACCUUUAGGCAATT   | UUGCCUAAAGGUGACUGGCTT   |
| NUP205-SiRNA-3  | CCAAGCCACUGUUAGACUUTT   | AAGUCU AACAGUGGCUUGGTT  |
| SKA3-SiRNA-1    | CCACGUAGUCCACAACUUUTT   | AAAGUUGUGGACUACGUGGTT   |
| SKA3-SiRNA-2    | CCUACACCUCCGGAAGUAATT   | UUACUUCGGAGGUGUAGGTT    |
| SKA3-SiRNA-3    | GCUACUCCA AUAGCAAUUATT  | UAAUUGCUAUUGGAGUAGCTT   |
| SPINDOC-SiRNA-1 | CCGAAGCAGCAGGUGUCUUTT   | AAGACACCU GUGCUUCGGTT   |
| SPINDOC-SiRNA-2 | GCCCUUCUGAGAAGAGCAATT   | UUGCUCUUCUCAGAAGGGCTT   |
| SPINDOC-SiRNA-3 | GCUUCGUCUUGCAGCUCUUTT   | AAGAGCUGCAAGACGAAGCTT   |
| SGO2-SiRNA-1    | CCUAGUAAUGUGACUGAAATT   | UUUCAGUCACAUUACUAGGTT   |
| SGO2-SiRNA-2    | GGAUUUAAACUGCUAGUGAATT  | UUCACUAGCAGUUAAAUCCTT   |
| SGO2-SiRNA-3    | CCACAUGUAUGAGGAUAAUUTT  | AUUAUCCUCAUACAUGUGGTT   |
| TMC03-SiRNA-1   | GCAGAUCACCACUUUUAUATT   | UUAUAAAGUGGUGAUCUGCTT   |
| TMC03-SiRNA-2   | CCAUAGGAUUGCCUACAAUUTT  | AUUGUAGGCAAUCCUAUGGTT   |
| TMC03-SiRNA-3   | GCUGGUCCUGUCUCUCAUUTT   | AAUGAGAGACAGGACCAGCTT   |
| TEDC2-SiRNA-1   | CCUGCGCACAGCGACAAUUTT   | AAUUGUCGUGUGCGCAGGTT    |
| TEDC2-SiRNA-2   | CCAGUCCACAAGACCUCAATT   | UUGAGGUCUUGUGGACUGGTT   |
| TEDC2-SiRNA-3   | CCUGAAAUCUAGGUCCAUUTT   | AAUGGACCUAGAUUUCAGGTT   |
| For qPCR        | Forward                 | Reverse                 |
| 18S             | GTAACCCGTTGAACCCATT     | CCATCCAATCGGTAGTAGCG    |
| NUP205          | AGATGATAATGCCTAAACCAG   | AGATAAAGTAAGCAAGAAAGATG |
| SKA3            | TACACGAGCAAGAAGCCATTAAC | GGATACGATGTACCGCTCAAGT  |
| SPINDOC         | TGACCACGGGGCTTCTTATTT   | TCGTCGTTCTCCTTGACTCTG   |
| SGOL2           | TAAAGCACAACAACAGGGCAT   | AGGCGAAGAAATGTGTTCTCAA  |
| TMC03           | AAACCAGGATTCGGAGA ACTT  | AGGCGACATTGACTACAGCAC   |
| TEDC2           | ATGCACACCCAGTCCACAAG    | CCGGCCTTAGTGATGCCTC     |

**Supplementary Table 7.** Clinical pathologic features in our HCC cohorts.

| Clinical pathologic parameters | No. of Specimens |
|--------------------------------|------------------|
| Sex                            | 22               |
| Female                         | 4                |
| Male                           | 18               |
| Age                            | 22               |
| ≤50                            | 8                |
| >50                            | 14               |
| Average                        | 56               |
| Drink                          | 22               |
| Yes                            | 8                |
| No                             | 14               |
| AFP                            | 22               |
| ≤20 ng/ml                      | 8                |
| 20-300 ng/ml                   | 6                |
| ≥300 ng/ml                     | 8                |
| Tumor size                     | 22               |
| ≤3 cm                          | 2                |
| 3-5 cm                         | 6                |
| >5 cm                          | 14               |
| Tumor number                   | 22               |
| =1                             | 18               |
| >1                             | 4                |
| Vascular invasion              | 22               |
| Yes                            | 16               |
| No                             | 6                |
| Grade                          | 22               |
| I                              | 5                |
| II                             | 9                |
| III                            | 6                |
| IV                             | 2                |

HCC: Hepatocellular carcinoma
